# Supplementary material for: Deep learning methods improve polygenic risk analysis and prediction for Alzheimer’s disease
Source: Research Square preprint supplement (doi:10.21203/rs.3.rs-818364/v1), 2021-09-07
Supplement: Supplementary file 1 [file NNP_code.pdf › NNP/NNP_code.pdf]

```
In [ ]: # Copyright (C) 2021 Nancy Yuk-Yu IP, The Hong Kong University of Science and Technology boip@ust.hk

# This program is free software: you can redistribute it and/or modify it under the terms
# of the GNU General Public License as published by the Free Software Foundation, either
# version 3 of the License, or (at your option) any later version.

# This program is distributed in the hope that it will be useful, but WITHOUT ANY WARRANTY;
# without even the implied warranty of MERCHANTABILITY or FITNESS FOR A PARTICULAR PURPOSE.
# See the GNU General Public License for more details.

# You should have received a copy of the GNU General Public License along with this program.
# If not, see <http://www.gnu.org/licenses/>
```

```
In [48]: # Check the working path

import os
import sys

#sys.path.append(os.path.expanduser('~')+"/miniconda3/lib/python3.8/site-packages")
CWD=os.getcwd()

print("Current working directory: {0}".format(CWD))
```

Current working directory: /mnt/f/WGS\_Paper/Draft/Package/Final

```
In [49]: # Seed seed value
seed_value= 9999

# Set the `PYTHONHASHSEED`

import os
os.environ['PYTHONHASHSEED']=str(seed_value)

# Set the `python` built-in pseudo-random generator

import random
random.seed(seed_value)

# Set the `numpy` pseudo-random generator

import numpy as np
np.random.seed(seed_value)
```

```
# Set the `tensorflow` pseudo-random generator
```

```
import tensorflow as tf  
tf.random.set_seed(seed_value)
```

In [50]:

```
# Read the training file  
# The column name for the outcome is "Phenotype"
```

```
import pandas
```

```
# Set number of variants
```

```
N_var=2861
```

```
train_data=pandas.read_table('train.txt',delim_whitespace=True)
```

```
train_X_col=train_data.columns[1:(N_var+1)]
```

```
train_X=train_data[train_X_col]
```

```
train_Y=train_data['Phenotype']
```

In [51]:

```
# Read the test file
```

```
test_data=pandas.read_table('test.txt',delim_whitespace=True)
```

```
test_X_col=test_data.columns[1:(N_var+1)]
```

```
test_X=test_data[test_X_col]
```

```
test_Y=test_data['Phenotype']
```

In [52]:

```
# NN model
```

```
from keras.models import Sequential
```

```
from keras.layers import Dense
```

```
from keras.layers import Dropout
```

```
from keras.layers import LSTM
```

```
from keras.layers import Embedding
```

```
from keras.regularizers import l1, l1_l2, l2
```

```
model = Sequential()
```

```
model.add(Dropout(0.3, input_shape=(N_var,)))
```

```

model.add(Dense(50, activation='sigmoid',
kernel_regularizer=l1(5e-5)))

model.add(Dropout(0.1))

model.add(Dense(20, activation='sigmoid',
kernel_regularizer=l1(5e-5)))

model.add(Dense(10, activation='sigmoid', ))

model.add(Dense(5, activation='sigmoid', ))

model.add(Dense(1, activation='sigmoid', ))

model.summary()

```

Model: "sequential\_3"

| Layer (type)              | Output Shape | Param # |
|---------------------------|--------------|---------|
| dropout_6 (Dropout)       | (None, 2861) | 0       |
| dense_15 (Dense)          | (None, 50)   | 143100  |
| dropout_7 (Dropout)       | (None, 50)   | 0       |
| dense_16 (Dense)          | (None, 20)   | 1020    |
| dense_17 (Dense)          | (None, 10)   | 210     |
| dense_18 (Dense)          | (None, 5)    | 55      |
| dense_19 (Dense)          | (None, 1)    | 6       |
| Total params: 144,391     |              |         |
| Trainable params: 144,391 |              |         |
| Non-trainable params: 0   |              |         |

In [53]:

```

# Compile the model for REGRESSION problem

# model.compile(loss='binary_crossentropy', optimizer='adam', metrics=['accuracy'])

# Alternatively, can try the exponential decay model

```

```

initial_learning_rate = 0.3
lr_schedule = tf.keras.optimizers.schedules.ExponentialDecay(
    initial_learning_rate,
    decay_steps=100000,
    decay_rate=0.96,
    staircase=True)

model.compile(optimizer=tf.keras.optimizers.SGD(learning_rate=lr_schedule),
    loss='binary_crossentropy',
    metrics=['accuracy'])

```

In [54]:

```
# Fit the model on the dataset
```

```

history = model.fit(train_X.values, train_Y.values, epochs=1000, batch_size=256, shuffle=False,
    validation_data=(test_X.values, test_Y.values))

```

```

Epoch 1/1000
5/5 [=====] - 0s 22ms/step - loss: 0.7746 - accuracy: 0.6190 - val_loss: 0.6721 - val_accuracy: 0.8027
Epoch 2/1000
5/5 [=====] - 0s 6ms/step - loss: 0.7266 - accuracy: 0.7947 - val_loss: 0.6656 - val_accuracy: 0.8027
Epoch 3/1000
5/5 [=====] - 0s 6ms/step - loss: 0.7310 - accuracy: 0.7947 - val_loss: 0.6677 - val_accuracy: 0.8027
Epoch 4/1000
5/5 [=====] - 0s 6ms/step - loss: 0.7350 - accuracy: 0.7947 - val_loss: 0.6691 - val_accuracy: 0.8027
Epoch 5/1000
5/5 [=====] - 0s 6ms/step - loss: 0.7365 - accuracy: 0.7947 - val_loss: 0.6694 - val_accuracy: 0.8027
Epoch 6/1000
5/5 [=====] - 0s 6ms/step - loss: 0.7366 - accuracy: 0.7947 - val_loss: 0.6691 - val_accuracy: 0.8027
Epoch 7/1000
5/5 [=====] - 0s 6ms/step - loss: 0.7360 - accuracy: 0.7947 - val_loss: 0.6686 - val_accuracy: 0.8027
Epoch 8/1000
5/5 [=====] - 0s 6ms/step - loss: 0.7352 - accuracy: 0.7947 - val_loss: 0.6679 - val_accuracy: 0.8027
Epoch 9/1000
5/5 [=====] - 0s 6ms/step - loss: 0.7341 - accuracy: 0.7947 - val_loss: 0.6671 - val_accuracy: 0.8027
Epoch 10/1000
5/5 [=====] - 0s 6ms/step - loss: 0.7330 - accuracy: 0.7947 - val_loss: 0.6664 - val_accuracy: 0.8027
Epoch 11/1000
5/5 [=====] - 0s 6ms/step - loss: 0.7318 - accuracy: 0.7947 - val_loss: 0.6656 - val_accuracy: 0.8027
Epoch 12/1000
5/5 [=====] - 0s 6ms/step - loss: 0.7308 - accuracy: 0.7947 - val_loss: 0.6648 - val_accuracy: 0.8027
Epoch 13/1000
5/5 [=====] - 0s 6ms/step - loss: 0.7296 - accuracy: 0.7947 - val_loss: 0.6640 - val_accuracy: 0.8027
Epoch 14/1000
5/5 [=====] - 0s 6ms/step - loss: 0.7285 - accuracy: 0.7947 - val_loss: 0.6633 - val_accuracy: 0.8027
Epoch 15/1000
5/5 [=====] - 0s 6ms/step - loss: 0.7274 - accuracy: 0.7947 - val_loss: 0.6625 - val_accuracy: 0.8027

```

Epoch 16/1000  
5/5 [=====] - 0s 6ms/step - loss: 0.7263 - accuracy: 0.7947 - val\_loss: 0.6618 - val\_accuracy: 0.8027  
Epoch 17/1000  
5/5 [=====] - 0s 6ms/step - loss: 0.7253 - accuracy: 0.7947 - val\_loss: 0.6610 - val\_accuracy: 0.8027  
Epoch 18/1000  
5/5 [=====] - 0s 6ms/step - loss: 0.7243 - accuracy: 0.7947 - val\_loss: 0.6603 - val\_accuracy: 0.8027  
Epoch 19/1000  
5/5 [=====] - 0s 6ms/step - loss: 0.7233 - accuracy: 0.7947 - val\_loss: 0.6595 - val\_accuracy: 0.8027  
Epoch 20/1000  
5/5 [=====] - 0s 6ms/step - loss: 0.7222 - accuracy: 0.7947 - val\_loss: 0.6588 - val\_accuracy: 0.8027  
Epoch 21/1000  
5/5 [=====] - 0s 6ms/step - loss: 0.7211 - accuracy: 0.7947 - val\_loss: 0.6581 - val\_accuracy: 0.8027  
Epoch 22/1000  
5/5 [=====] - 0s 6ms/step - loss: 0.7201 - accuracy: 0.7947 - val\_loss: 0.6574 - val\_accuracy: 0.8027  
Epoch 23/1000  
5/5 [=====] - 0s 6ms/step - loss: 0.7193 - accuracy: 0.7947 - val\_loss: 0.6567 - val\_accuracy: 0.8027  
Epoch 24/1000  
5/5 [=====] - 0s 6ms/step - loss: 0.7182 - accuracy: 0.7947 - val\_loss: 0.6560 - val\_accuracy: 0.8027  
Epoch 25/1000  
5/5 [=====] - 0s 6ms/step - loss: 0.7174 - accuracy: 0.7947 - val\_loss: 0.6553 - val\_accuracy: 0.8027  
Epoch 26/1000  
5/5 [=====] - 0s 6ms/step - loss: 0.7163 - accuracy: 0.7947 - val\_loss: 0.6546 - val\_accuracy: 0.8027  
Epoch 27/1000  
5/5 [=====] - 0s 6ms/step - loss: 0.7154 - accuracy: 0.7947 - val\_loss: 0.6539 - val\_accuracy: 0.8027  
Epoch 28/1000  
5/5 [=====] - 0s 6ms/step - loss: 0.7144 - accuracy: 0.7947 - val\_loss: 0.6532 - val\_accuracy: 0.8027  
Epoch 29/1000  
5/5 [=====] - 0s 6ms/step - loss: 0.7136 - accuracy: 0.7947 - val\_loss: 0.6525 - val\_accuracy: 0.8027  
Epoch 30/1000  
5/5 [=====] - 0s 6ms/step - loss: 0.7127 - accuracy: 0.7947 - val\_loss: 0.6518 - val\_accuracy: 0.8027  
Epoch 31/1000  
5/5 [=====] - 0s 6ms/step - loss: 0.7117 - accuracy: 0.7947 - val\_loss: 0.6511 - val\_accuracy: 0.8027  
Epoch 32/1000  
5/5 [=====] - 0s 6ms/step - loss: 0.7107 - accuracy: 0.7947 - val\_loss: 0.6504 - val\_accuracy: 0.8027  
Epoch 33/1000  
5/5 [=====] - 0s 6ms/step - loss: 0.7099 - accuracy: 0.7947 - val\_loss: 0.6497 - val\_accuracy: 0.8027  
Epoch 34/1000  
5/5 [=====] - 0s 6ms/step - loss: 0.7090 - accuracy: 0.7947 - val\_loss: 0.6490 - val\_accuracy: 0.8027  
Epoch 35/1000  
5/5 [=====] - 0s 6ms/step - loss: 0.7081 - accuracy: 0.7947 - val\_loss: 0.6483 - val\_accuracy: 0.8027  
Epoch 36/1000  
5/5 [=====] - 0s 6ms/step - loss: 0.7074 - accuracy: 0.7947 - val\_loss: 0.6477 - val\_accuracy: 0.8027  
Epoch 37/1000  
5/5 [=====] - 0s 6ms/step - loss: 0.7064 - accuracy: 0.7947 - val\_loss: 0.6470 - val\_accuracy: 0.8027  
Epoch 38/1000  
5/5 [=====] - 0s 6ms/step - loss: 0.7055 - accuracy: 0.7947 - val\_loss: 0.6463 - val\_accuracy: 0.8027  
Epoch 39/1000  
5/5 [=====] - 0s 6ms/step - loss: 0.7048 - accuracy: 0.7947 - val\_loss: 0.6456 - val\_accuracy: 0.8027  
Epoch 40/1000  
5/5 [=====] - 0s 6ms/step - loss: 0.7038 - accuracy: 0.7947 - val\_loss: 0.6449 - val\_accuracy: 0.8027

```
Epoch 41/1000
5/5 [=====] - 0s 6ms/step - loss: 0.7031 - accuracy: 0.7947 - val_loss: 0.6442 - val_accuracy: 0.8027
Epoch 42/1000
5/5 [=====] - 0s 6ms/step - loss: 0.7022 - accuracy: 0.7947 - val_loss: 0.6435 - val_accuracy: 0.8027
Epoch 43/1000
5/5 [=====] - 0s 6ms/step - loss: 0.7014 - accuracy: 0.7947 - val_loss: 0.6428 - val_accuracy: 0.8027
Epoch 44/1000
5/5 [=====] - 0s 6ms/step - loss: 0.7007 - accuracy: 0.7947 - val_loss: 0.6422 - val_accuracy: 0.8027
Epoch 45/1000
5/5 [=====] - 0s 6ms/step - loss: 0.6996 - accuracy: 0.7947 - val_loss: 0.6415 - val_accuracy: 0.8027
Epoch 46/1000
5/5 [=====] - 0s 6ms/step - loss: 0.6988 - accuracy: 0.7947 - val_loss: 0.6408 - val_accuracy: 0.8027
Epoch 47/1000
5/5 [=====] - 0s 6ms/step - loss: 0.6980 - accuracy: 0.7947 - val_loss: 0.6401 - val_accuracy: 0.8027
Epoch 48/1000
5/5 [=====] - 0s 6ms/step - loss: 0.6972 - accuracy: 0.7947 - val_loss: 0.6394 - val_accuracy: 0.8027
Epoch 49/1000
5/5 [=====] - 0s 6ms/step - loss: 0.6964 - accuracy: 0.7947 - val_loss: 0.6386 - val_accuracy: 0.8027
Epoch 50/1000
5/5 [=====] - 0s 6ms/step - loss: 0.6954 - accuracy: 0.7947 - val_loss: 0.6379 - val_accuracy: 0.8027
Epoch 51/1000
5/5 [=====] - 0s 6ms/step - loss: 0.6948 - accuracy: 0.7947 - val_loss: 0.6372 - val_accuracy: 0.8027
Epoch 52/1000
5/5 [=====] - 0s 6ms/step - loss: 0.6938 - accuracy: 0.7947 - val_loss: 0.6365 - val_accuracy: 0.8027
Epoch 53/1000
5/5 [=====] - 0s 6ms/step - loss: 0.6931 - accuracy: 0.7947 - val_loss: 0.6358 - val_accuracy: 0.8027
Epoch 54/1000
5/5 [=====] - 0s 6ms/step - loss: 0.6923 - accuracy: 0.7947 - val_loss: 0.6351 - val_accuracy: 0.8027
Epoch 55/1000
5/5 [=====] - 0s 6ms/step - loss: 0.6913 - accuracy: 0.7947 - val_loss: 0.6343 - val_accuracy: 0.8027
Epoch 56/1000
5/5 [=====] - 0s 6ms/step - loss: 0.6906 - accuracy: 0.7947 - val_loss: 0.6336 - val_accuracy: 0.8027
Epoch 57/1000
5/5 [=====] - 0s 6ms/step - loss: 0.6897 - accuracy: 0.7947 - val_loss: 0.6328 - val_accuracy: 0.8027
Epoch 58/1000
5/5 [=====] - 0s 6ms/step - loss: 0.6887 - accuracy: 0.7947 - val_loss: 0.6321 - val_accuracy: 0.8027
Epoch 59/1000
5/5 [=====] - 0s 6ms/step - loss: 0.6879 - accuracy: 0.7947 - val_loss: 0.6313 - val_accuracy: 0.8027
Epoch 60/1000
5/5 [=====] - 0s 6ms/step - loss: 0.6871 - accuracy: 0.7947 - val_loss: 0.6306 - val_accuracy: 0.8027
Epoch 61/1000
5/5 [=====] - 0s 6ms/step - loss: 0.6862 - accuracy: 0.7947 - val_loss: 0.6298 - val_accuracy: 0.8027
Epoch 62/1000
5/5 [=====] - 0s 6ms/step - loss: 0.6853 - accuracy: 0.7947 - val_loss: 0.6290 - val_accuracy: 0.8027
Epoch 63/1000
5/5 [=====] - 0s 6ms/step - loss: 0.6846 - accuracy: 0.7947 - val_loss: 0.6282 - val_accuracy: 0.8027
Epoch 64/1000
5/5 [=====] - 0s 6ms/step - loss: 0.6839 - accuracy: 0.7947 - val_loss: 0.6274 - val_accuracy: 0.8027
Epoch 65/1000
5/5 [=====] - 0s 6ms/step - loss: 0.6829 - accuracy: 0.7947 - val_loss: 0.6266 - val_accuracy: 0.8027
```

```
Epoch 66/1000
5/5 [=====] - 0s 6ms/step - loss: 0.6821 - accuracy: 0.7947 - val_loss: 0.6258 - val_accuracy: 0.8027
Epoch 67/1000
5/5 [=====] - 0s 6ms/step - loss: 0.6811 - accuracy: 0.7947 - val_loss: 0.6250 - val_accuracy: 0.8027
Epoch 68/1000
5/5 [=====] - 0s 6ms/step - loss: 0.6803 - accuracy: 0.7947 - val_loss: 0.6242 - val_accuracy: 0.8027
Epoch 69/1000
5/5 [=====] - 0s 6ms/step - loss: 0.6793 - accuracy: 0.7947 - val_loss: 0.6233 - val_accuracy: 0.8027
Epoch 70/1000
5/5 [=====] - 0s 6ms/step - loss: 0.6784 - accuracy: 0.7947 - val_loss: 0.6225 - val_accuracy: 0.8027
Epoch 71/1000
5/5 [=====] - 0s 6ms/step - loss: 0.6775 - accuracy: 0.7947 - val_loss: 0.6216 - val_accuracy: 0.8027
Epoch 72/1000
5/5 [=====] - 0s 6ms/step - loss: 0.6763 - accuracy: 0.7947 - val_loss: 0.6207 - val_accuracy: 0.8027
Epoch 73/1000
5/5 [=====] - 0s 6ms/step - loss: 0.6755 - accuracy: 0.7947 - val_loss: 0.6198 - val_accuracy: 0.8027
Epoch 74/1000
5/5 [=====] - 0s 6ms/step - loss: 0.6747 - accuracy: 0.7947 - val_loss: 0.6189 - val_accuracy: 0.8027
Epoch 75/1000
5/5 [=====] - 0s 6ms/step - loss: 0.6737 - accuracy: 0.7947 - val_loss: 0.6180 - val_accuracy: 0.8027
Epoch 76/1000
5/5 [=====] - 0s 6ms/step - loss: 0.6728 - accuracy: 0.7947 - val_loss: 0.6171 - val_accuracy: 0.8027
Epoch 77/1000
5/5 [=====] - 0s 6ms/step - loss: 0.6715 - accuracy: 0.7947 - val_loss: 0.6161 - val_accuracy: 0.8027
Epoch 78/1000
5/5 [=====] - 0s 6ms/step - loss: 0.6706 - accuracy: 0.7947 - val_loss: 0.6151 - val_accuracy: 0.8027
Epoch 79/1000
5/5 [=====] - 0s 6ms/step - loss: 0.6699 - accuracy: 0.7947 - val_loss: 0.6141 - val_accuracy: 0.8027
Epoch 80/1000
5/5 [=====] - 0s 6ms/step - loss: 0.6689 - accuracy: 0.7947 - val_loss: 0.6131 - val_accuracy: 0.8027
Epoch 81/1000
5/5 [=====] - 0s 6ms/step - loss: 0.6680 - accuracy: 0.7947 - val_loss: 0.6121 - val_accuracy: 0.8027
Epoch 82/1000
5/5 [=====] - 0s 6ms/step - loss: 0.6668 - accuracy: 0.7947 - val_loss: 0.6111 - val_accuracy: 0.8027
Epoch 83/1000
5/5 [=====] - 0s 6ms/step - loss: 0.6659 - accuracy: 0.7947 - val_loss: 0.6100 - val_accuracy: 0.8027
Epoch 84/1000
5/5 [=====] - 0s 6ms/step - loss: 0.6645 - accuracy: 0.7947 - val_loss: 0.6089 - val_accuracy: 0.8027
Epoch 85/1000
5/5 [=====] - 0s 6ms/step - loss: 0.6633 - accuracy: 0.7947 - val_loss: 0.6078 - val_accuracy: 0.8027
Epoch 86/1000
5/5 [=====] - 0s 6ms/step - loss: 0.6625 - accuracy: 0.7947 - val_loss: 0.6066 - val_accuracy: 0.8027
Epoch 87/1000
5/5 [=====] - 0s 6ms/step - loss: 0.6613 - accuracy: 0.7947 - val_loss: 0.6055 - val_accuracy: 0.8027
Epoch 88/1000
5/5 [=====] - 0s 6ms/step - loss: 0.6604 - accuracy: 0.7947 - val_loss: 0.6043 - val_accuracy: 0.8027
Epoch 89/1000
5/5 [=====] - 0s 6ms/step - loss: 0.6593 - accuracy: 0.7947 - val_loss: 0.6031 - val_accuracy: 0.8027
Epoch 90/1000
5/5 [=====] - 0s 6ms/step - loss: 0.6573 - accuracy: 0.7947 - val_loss: 0.6019 - val_accuracy: 0.8027
```

```
Epoch 91/1000
5/5 [=====] - 0s 6ms/step - loss: 0.6561 - accuracy: 0.7947 - val_loss: 0.6007 - val_accuracy: 0.8027
Epoch 92/1000
5/5 [=====] - 0s 6ms/step - loss: 0.6556 - accuracy: 0.7947 - val_loss: 0.5994 - val_accuracy: 0.8027
Epoch 93/1000
5/5 [=====] - 0s 6ms/step - loss: 0.6537 - accuracy: 0.7947 - val_loss: 0.5981 - val_accuracy: 0.8027
Epoch 94/1000
5/5 [=====] - 0s 6ms/step - loss: 0.6526 - accuracy: 0.7947 - val_loss: 0.5968 - val_accuracy: 0.8027
Epoch 95/1000
5/5 [=====] - 0s 6ms/step - loss: 0.6517 - accuracy: 0.7947 - val_loss: 0.5954 - val_accuracy: 0.8027
Epoch 96/1000
5/5 [=====] - 0s 6ms/step - loss: 0.6502 - accuracy: 0.7947 - val_loss: 0.5940 - val_accuracy: 0.8027
Epoch 97/1000
5/5 [=====] - 0s 6ms/step - loss: 0.6483 - accuracy: 0.7947 - val_loss: 0.5926 - val_accuracy: 0.8027
Epoch 98/1000
5/5 [=====] - 0s 6ms/step - loss: 0.6475 - accuracy: 0.7947 - val_loss: 0.5911 - val_accuracy: 0.8027
Epoch 99/1000
5/5 [=====] - 0s 6ms/step - loss: 0.6458 - accuracy: 0.7947 - val_loss: 0.5896 - val_accuracy: 0.8027
Epoch 100/1000
5/5 [=====] - 0s 6ms/step - loss: 0.6449 - accuracy: 0.7947 - val_loss: 0.5881 - val_accuracy: 0.8027
Epoch 101/1000
5/5 [=====] - 0s 6ms/step - loss: 0.6438 - accuracy: 0.7947 - val_loss: 0.5866 - val_accuracy: 0.8027
Epoch 102/1000
5/5 [=====] - 0s 6ms/step - loss: 0.6418 - accuracy: 0.7947 - val_loss: 0.5850 - val_accuracy: 0.8027
Epoch 103/1000
5/5 [=====] - 0s 6ms/step - loss: 0.6406 - accuracy: 0.7947 - val_loss: 0.5835 - val_accuracy: 0.8027
Epoch 104/1000
5/5 [=====] - 0s 6ms/step - loss: 0.6387 - accuracy: 0.7947 - val_loss: 0.5818 - val_accuracy: 0.8027
Epoch 105/1000
5/5 [=====] - 0s 6ms/step - loss: 0.6368 - accuracy: 0.7947 - val_loss: 0.5802 - val_accuracy: 0.8027
Epoch 106/1000
5/5 [=====] - 0s 6ms/step - loss: 0.6358 - accuracy: 0.7947 - val_loss: 0.5785 - val_accuracy: 0.8027
Epoch 107/1000
5/5 [=====] - 0s 6ms/step - loss: 0.6337 - accuracy: 0.7947 - val_loss: 0.5769 - val_accuracy: 0.8027
Epoch 108/1000
5/5 [=====] - 0s 6ms/step - loss: 0.6325 - accuracy: 0.7947 - val_loss: 0.5751 - val_accuracy: 0.8027
Epoch 109/1000
5/5 [=====] - 0s 6ms/step - loss: 0.6308 - accuracy: 0.7947 - val_loss: 0.5734 - val_accuracy: 0.8027
Epoch 110/1000
5/5 [=====] - 0s 6ms/step - loss: 0.6292 - accuracy: 0.7947 - val_loss: 0.5717 - val_accuracy: 0.8027
Epoch 111/1000
5/5 [=====] - 0s 6ms/step - loss: 0.6278 - accuracy: 0.7947 - val_loss: 0.5699 - val_accuracy: 0.8027
Epoch 112/1000
5/5 [=====] - 0s 6ms/step - loss: 0.6259 - accuracy: 0.7947 - val_loss: 0.5681 - val_accuracy: 0.8027
Epoch 113/1000
5/5 [=====] - 0s 6ms/step - loss: 0.6250 - accuracy: 0.7947 - val_loss: 0.5665 - val_accuracy: 0.8027
Epoch 114/1000
5/5 [=====] - 0s 6ms/step - loss: 0.6228 - accuracy: 0.7947 - val_loss: 0.5647 - val_accuracy: 0.8027
Epoch 115/1000
5/5 [=====] - 0s 6ms/step - loss: 0.6215 - accuracy: 0.7947 - val_loss: 0.5628 - val_accuracy: 0.8027
```



```
Epoch 116/1000
5/5 [=====] - 0s 6ms/step - loss: 0.6189 - accuracy: 0.7947 - val_loss: 0.5610 - val_accuracy: 0.8027
Epoch 117/1000
5/5 [=====] - 0s 6ms/step - loss: 0.6167 - accuracy: 0.7947 - val_loss: 0.5591 - val_accuracy: 0.8027
Epoch 118/1000
5/5 [=====] - 0s 6ms/step - loss: 0.6170 - accuracy: 0.7947 - val_loss: 0.5573 - val_accuracy: 0.8027
Epoch 119/1000
5/5 [=====] - 0s 6ms/step - loss: 0.6137 - accuracy: 0.7947 - val_loss: 0.5556 - val_accuracy: 0.8027
Epoch 120/1000
5/5 [=====] - 0s 6ms/step - loss: 0.6129 - accuracy: 0.7947 - val_loss: 0.5539 - val_accuracy: 0.8027
Epoch 121/1000
5/5 [=====] - 0s 6ms/step - loss: 0.6121 - accuracy: 0.7947 - val_loss: 0.5522 - val_accuracy: 0.8027
Epoch 122/1000
5/5 [=====] - 0s 6ms/step - loss: 0.6095 - accuracy: 0.7947 - val_loss: 0.5505 - val_accuracy: 0.8027
Epoch 123/1000
5/5 [=====] - 0s 6ms/step - loss: 0.6070 - accuracy: 0.7947 - val_loss: 0.5486 - val_accuracy: 0.8027
Epoch 124/1000
5/5 [=====] - 0s 6ms/step - loss: 0.6068 - accuracy: 0.7947 - val_loss: 0.5468 - val_accuracy: 0.8027
Epoch 125/1000
5/5 [=====] - 0s 6ms/step - loss: 0.6041 - accuracy: 0.7947 - val_loss: 0.5451 - val_accuracy: 0.8027
Epoch 126/1000
5/5 [=====] - 0s 6ms/step - loss: 0.6030 - accuracy: 0.7947 - val_loss: 0.5435 - val_accuracy: 0.8027
Epoch 127/1000
5/5 [=====] - 0s 6ms/step - loss: 0.6008 - accuracy: 0.7947 - val_loss: 0.5419 - val_accuracy: 0.8027
Epoch 128/1000
5/5 [=====] - 0s 6ms/step - loss: 0.5995 - accuracy: 0.7947 - val_loss: 0.5402 - val_accuracy: 0.8027
Epoch 129/1000
5/5 [=====] - 0s 6ms/step - loss: 0.5973 - accuracy: 0.7947 - val_loss: 0.5387 - val_accuracy: 0.8027
Epoch 130/1000
5/5 [=====] - 0s 6ms/step - loss: 0.5967 - accuracy: 0.7947 - val_loss: 0.5372 - val_accuracy: 0.8027
Epoch 131/1000
5/5 [=====] - 0s 6ms/step - loss: 0.5973 - accuracy: 0.7947 - val_loss: 0.5356 - val_accuracy: 0.8027
Epoch 132/1000
5/5 [=====] - 0s 6ms/step - loss: 0.5953 - accuracy: 0.7947 - val_loss: 0.5343 - val_accuracy: 0.8027
Epoch 133/1000
5/5 [=====] - 0s 6ms/step - loss: 0.5916 - accuracy: 0.7947 - val_loss: 0.5330 - val_accuracy: 0.8027
Epoch 134/1000
5/5 [=====] - 0s 6ms/step - loss: 0.5903 - accuracy: 0.7947 - val_loss: 0.5313 - val_accuracy: 0.8027
Epoch 135/1000
5/5 [=====] - 0s 6ms/step - loss: 0.5890 - accuracy: 0.7947 - val_loss: 0.5299 - val_accuracy: 0.8027
Epoch 136/1000
5/5 [=====] - 0s 6ms/step - loss: 0.5887 - accuracy: 0.7947 - val_loss: 0.5286 - val_accuracy: 0.8027
Epoch 137/1000
5/5 [=====] - 0s 6ms/step - loss: 0.5861 - accuracy: 0.7947 - val_loss: 0.5274 - val_accuracy: 0.8027
Epoch 138/1000
5/5 [=====] - 0s 6ms/step - loss: 0.5877 - accuracy: 0.7947 - val_loss: 0.5259 - val_accuracy: 0.8027
Epoch 139/1000
5/5 [=====] - 0s 6ms/step - loss: 0.5819 - accuracy: 0.7947 - val_loss: 0.5249 - val_accuracy: 0.8027
Epoch 140/1000
5/5 [=====] - 0s 6ms/step - loss: 0.5836 - accuracy: 0.7947 - val_loss: 0.5233 - val_accuracy: 0.8027
```

Epoch 141/1000  
5/5 [=====] - 0s 6ms/step - loss: 0.5808 - accuracy: 0.7947 - val\_loss: 0.5221 - val\_accuracy: 0.8027  
Epoch 142/1000  
5/5 [=====] - 0s 6ms/step - loss: 0.5793 - accuracy: 0.7947 - val\_loss: 0.5209 - val\_accuracy: 0.8027  
Epoch 143/1000  
5/5 [=====] - 0s 6ms/step - loss: 0.5778 - accuracy: 0.7947 - val\_loss: 0.5200 - val\_accuracy: 0.8027  
Epoch 144/1000  
5/5 [=====] - 0s 6ms/step - loss: 0.5794 - accuracy: 0.7947 - val\_loss: 0.5187 - val\_accuracy: 0.8027  
Epoch 145/1000  
5/5 [=====] - 0s 6ms/step - loss: 0.5762 - accuracy: 0.7947 - val\_loss: 0.5176 - val\_accuracy: 0.8027  
Epoch 146/1000  
5/5 [=====] - 0s 6ms/step - loss: 0.5748 - accuracy: 0.7947 - val\_loss: 0.5166 - val\_accuracy: 0.8027  
Epoch 147/1000  
5/5 [=====] - 0s 6ms/step - loss: 0.5753 - accuracy: 0.7947 - val\_loss: 0.5153 - val\_accuracy: 0.8027  
Epoch 148/1000  
5/5 [=====] - 0s 6ms/step - loss: 0.5744 - accuracy: 0.7947 - val\_loss: 0.5143 - val\_accuracy: 0.8027  
Epoch 149/1000  
5/5 [=====] - 0s 6ms/step - loss: 0.5715 - accuracy: 0.7947 - val\_loss: 0.5133 - val\_accuracy: 0.8027  
Epoch 150/1000  
5/5 [=====] - 0s 6ms/step - loss: 0.5698 - accuracy: 0.7947 - val\_loss: 0.5124 - val\_accuracy: 0.8027  
Epoch 151/1000  
5/5 [=====] - 0s 6ms/step - loss: 0.5703 - accuracy: 0.7947 - val\_loss: 0.5113 - val\_accuracy: 0.8027  
Epoch 152/1000  
5/5 [=====] - 0s 6ms/step - loss: 0.5690 - accuracy: 0.7947 - val\_loss: 0.5101 - val\_accuracy: 0.8027  
Epoch 153/1000  
5/5 [=====] - 0s 6ms/step - loss: 0.5665 - accuracy: 0.7947 - val\_loss: 0.5093 - val\_accuracy: 0.8027  
Epoch 154/1000  
5/5 [=====] - 0s 6ms/step - loss: 0.5657 - accuracy: 0.7947 - val\_loss: 0.5084 - val\_accuracy: 0.8027  
Epoch 155/1000  
5/5 [=====] - 0s 6ms/step - loss: 0.5638 - accuracy: 0.7947 - val\_loss: 0.5073 - val\_accuracy: 0.8027  
Epoch 156/1000  
5/5 [=====] - 0s 6ms/step - loss: 0.5645 - accuracy: 0.7947 - val\_loss: 0.5065 - val\_accuracy: 0.8027  
Epoch 157/1000  
5/5 [=====] - 0s 6ms/step - loss: 0.5643 - accuracy: 0.7947 - val\_loss: 0.5054 - val\_accuracy: 0.8027  
Epoch 158/1000  
5/5 [=====] - 0s 6ms/step - loss: 0.5610 - accuracy: 0.7947 - val\_loss: 0.5046 - val\_accuracy: 0.8027  
Epoch 159/1000  
5/5 [=====] - 0s 6ms/step - loss: 0.5584 - accuracy: 0.7947 - val\_loss: 0.5040 - val\_accuracy: 0.8027  
Epoch 160/1000  
5/5 [=====] - 0s 6ms/step - loss: 0.5612 - accuracy: 0.7947 - val\_loss: 0.5029 - val\_accuracy: 0.8027  
Epoch 161/1000  
5/5 [=====] - 0s 6ms/step - loss: 0.5598 - accuracy: 0.7947 - val\_loss: 0.5022 - val\_accuracy: 0.8027  
Epoch 162/1000  
5/5 [=====] - 0s 6ms/step - loss: 0.5570 - accuracy: 0.7947 - val\_loss: 0.5011 - val\_accuracy: 0.8027  
Epoch 163/1000  
5/5 [=====] - 0s 6ms/step - loss: 0.5548 - accuracy: 0.7947 - val\_loss: 0.5004 - val\_accuracy: 0.8027  
Epoch 164/1000  
5/5 [=====] - 0s 6ms/step - loss: 0.5551 - accuracy: 0.7947 - val\_loss: 0.4997 - val\_accuracy: 0.8027  
Epoch 165/1000  
5/5 [=====] - 0s 6ms/step - loss: 0.5546 - accuracy: 0.7947 - val\_loss: 0.4987 - val\_accuracy: 0.8027

Epoch 166/1000  
5/5 [=====] - 0s 6ms/step - loss: 0.5568 - accuracy: 0.7947 - val\_loss: 0.4980 - val\_accuracy: 0.8027  
Epoch 167/1000  
5/5 [=====] - 0s 6ms/step - loss: 0.5496 - accuracy: 0.7947 - val\_loss: 0.4973 - val\_accuracy: 0.8027  
Epoch 168/1000  
5/5 [=====] - 0s 6ms/step - loss: 0.5491 - accuracy: 0.7931 - val\_loss: 0.4966 - val\_accuracy: 0.8027  
Epoch 169/1000  
5/5 [=====] - 0s 6ms/step - loss: 0.5498 - accuracy: 0.7859 - val\_loss: 0.4958 - val\_accuracy: 0.8027  
Epoch 170/1000  
5/5 [=====] - 0s 6ms/step - loss: 0.5514 - accuracy: 0.7851 - val\_loss: 0.4946 - val\_accuracy: 0.8027  
Epoch 171/1000  
5/5 [=====] - 0s 6ms/step - loss: 0.5504 - accuracy: 0.7875 - val\_loss: 0.4939 - val\_accuracy: 0.8027  
Epoch 172/1000  
5/5 [=====] - 0s 6ms/step - loss: 0.5477 - accuracy: 0.7835 - val\_loss: 0.4930 - val\_accuracy: 0.8027  
Epoch 173/1000  
5/5 [=====] - 0s 6ms/step - loss: 0.5488 - accuracy: 0.7835 - val\_loss: 0.4922 - val\_accuracy: 0.8027  
Epoch 174/1000  
5/5 [=====] - 0s 6ms/step - loss: 0.5423 - accuracy: 0.7819 - val\_loss: 0.4917 - val\_accuracy: 0.8027  
Epoch 175/1000  
5/5 [=====] - 0s 6ms/step - loss: 0.5475 - accuracy: 0.7843 - val\_loss: 0.4905 - val\_accuracy: 0.8027  
Epoch 176/1000  
5/5 [=====] - 0s 6ms/step - loss: 0.5452 - accuracy: 0.7788 - val\_loss: 0.4899 - val\_accuracy: 0.8027  
Epoch 177/1000  
5/5 [=====] - 0s 6ms/step - loss: 0.5410 - accuracy: 0.7764 - val\_loss: 0.4887 - val\_accuracy: 0.8027  
Epoch 178/1000  
5/5 [=====] - 0s 6ms/step - loss: 0.5387 - accuracy: 0.7732 - val\_loss: 0.4880 - val\_accuracy: 0.8027  
Epoch 179/1000  
5/5 [=====] - 0s 6ms/step - loss: 0.5435 - accuracy: 0.7724 - val\_loss: 0.4871 - val\_accuracy: 0.8027  
Epoch 180/1000  
5/5 [=====] - 0s 6ms/step - loss: 0.5372 - accuracy: 0.7748 - val\_loss: 0.4866 - val\_accuracy: 0.8027  
Epoch 181/1000  
5/5 [=====] - 0s 6ms/step - loss: 0.5399 - accuracy: 0.7724 - val\_loss: 0.4852 - val\_accuracy: 0.8027  
Epoch 182/1000  
5/5 [=====] - 0s 6ms/step - loss: 0.5412 - accuracy: 0.7692 - val\_loss: 0.4843 - val\_accuracy: 0.8027  
Epoch 183/1000  
5/5 [=====] - 0s 6ms/step - loss: 0.5337 - accuracy: 0.7676 - val\_loss: 0.4839 - val\_accuracy: 0.8027  
Epoch 184/1000  
5/5 [=====] - 0s 6ms/step - loss: 0.5385 - accuracy: 0.7668 - val\_loss: 0.4829 - val\_accuracy: 0.8027  
Epoch 185/1000  
5/5 [=====] - 0s 6ms/step - loss: 0.5363 - accuracy: 0.7676 - val\_loss: 0.4825 - val\_accuracy: 0.8027  
Epoch 186/1000  
5/5 [=====] - 0s 6ms/step - loss: 0.5358 - accuracy: 0.7660 - val\_loss: 0.4819 - val\_accuracy: 0.8027  
Epoch 187/1000  
5/5 [=====] - 0s 6ms/step - loss: 0.5325 - accuracy: 0.7692 - val\_loss: 0.4810 - val\_accuracy: 0.8027  
Epoch 188/1000  
5/5 [=====] - 0s 6ms/step - loss: 0.5304 - accuracy: 0.7684 - val\_loss: 0.4800 - val\_accuracy: 0.8027  
Epoch 189/1000  
5/5 [=====] - 0s 6ms/step - loss: 0.5289 - accuracy: 0.7644 - val\_loss: 0.4797 - val\_accuracy: 0.8027  
Epoch 190/1000  
5/5 [=====] - 0s 6ms/step - loss: 0.5325 - accuracy: 0.7620 - val\_loss: 0.4790 - val\_accuracy: 0.8027

```
Epoch 191/1000
5/5 [=====] - 0s 6ms/step - loss: 0.5310 - accuracy: 0.7636 - val_loss: 0.4779 - val_accuracy: 0.8027
Epoch 192/1000
5/5 [=====] - 0s 6ms/step - loss: 0.5301 - accuracy: 0.7636 - val_loss: 0.4772 - val_accuracy: 0.8027
Epoch 193/1000
5/5 [=====] - 0s 6ms/step - loss: 0.5304 - accuracy: 0.7628 - val_loss: 0.4763 - val_accuracy: 0.8027
Epoch 194/1000
5/5 [=====] - 0s 6ms/step - loss: 0.5264 - accuracy: 0.7644 - val_loss: 0.4758 - val_accuracy: 0.8027
Epoch 195/1000
5/5 [=====] - 0s 6ms/step - loss: 0.5291 - accuracy: 0.7572 - val_loss: 0.4745 - val_accuracy: 0.8027
Epoch 196/1000
5/5 [=====] - 0s 6ms/step - loss: 0.5268 - accuracy: 0.7612 - val_loss: 0.4738 - val_accuracy: 0.8027
Epoch 197/1000
5/5 [=====] - 0s 6ms/step - loss: 0.5247 - accuracy: 0.7652 - val_loss: 0.4730 - val_accuracy: 0.8027
Epoch 198/1000
5/5 [=====] - 0s 6ms/step - loss: 0.5245 - accuracy: 0.7588 - val_loss: 0.4728 - val_accuracy: 0.8027
Epoch 199/1000
5/5 [=====] - 0s 6ms/step - loss: 0.5207 - accuracy: 0.7660 - val_loss: 0.4719 - val_accuracy: 0.8027
Epoch 200/1000
5/5 [=====] - 0s 6ms/step - loss: 0.5199 - accuracy: 0.7612 - val_loss: 0.4714 - val_accuracy: 0.8027
Epoch 201/1000
5/5 [=====] - 0s 6ms/step - loss: 0.5246 - accuracy: 0.7572 - val_loss: 0.4707 - val_accuracy: 0.8027
Epoch 202/1000
5/5 [=====] - 0s 6ms/step - loss: 0.5218 - accuracy: 0.7572 - val_loss: 0.4701 - val_accuracy: 0.8027
Epoch 203/1000
5/5 [=====] - 0s 6ms/step - loss: 0.5201 - accuracy: 0.7548 - val_loss: 0.4694 - val_accuracy: 0.8027
Epoch 204/1000
5/5 [=====] - 0s 6ms/step - loss: 0.5272 - accuracy: 0.7532 - val_loss: 0.4683 - val_accuracy: 0.8027
Epoch 205/1000
5/5 [=====] - 0s 6ms/step - loss: 0.5216 - accuracy: 0.7556 - val_loss: 0.4679 - val_accuracy: 0.8027
Epoch 206/1000
5/5 [=====] - 0s 6ms/step - loss: 0.5205 - accuracy: 0.7548 - val_loss: 0.4673 - val_accuracy: 0.8027
Epoch 207/1000
5/5 [=====] - 0s 6ms/step - loss: 0.5191 - accuracy: 0.7524 - val_loss: 0.4671 - val_accuracy: 0.8027
Epoch 208/1000
5/5 [=====] - 0s 6ms/step - loss: 0.5221 - accuracy: 0.7556 - val_loss: 0.4662 - val_accuracy: 0.8027
Epoch 209/1000
5/5 [=====] - 0s 6ms/step - loss: 0.5164 - accuracy: 0.7540 - val_loss: 0.4657 - val_accuracy: 0.8027
Epoch 210/1000
5/5 [=====] - 0s 6ms/step - loss: 0.5185 - accuracy: 0.7572 - val_loss: 0.4654 - val_accuracy: 0.8027
Epoch 211/1000
5/5 [=====] - 0s 6ms/step - loss: 0.5195 - accuracy: 0.7516 - val_loss: 0.4641 - val_accuracy: 0.8027
Epoch 212/1000
5/5 [=====] - 0s 6ms/step - loss: 0.5171 - accuracy: 0.7492 - val_loss: 0.4633 - val_accuracy: 0.8027
Epoch 213/1000
5/5 [=====] - 0s 6ms/step - loss: 0.5117 - accuracy: 0.7532 - val_loss: 0.4631 - val_accuracy: 0.8027
Epoch 214/1000
5/5 [=====] - 0s 6ms/step - loss: 0.5168 - accuracy: 0.7548 - val_loss: 0.4623 - val_accuracy: 0.8027
Epoch 215/1000
5/5 [=====] - 0s 6ms/step - loss: 0.5120 - accuracy: 0.7508 - val_loss: 0.4619 - val_accuracy: 0.8027
```

Epoch 216/1000  
5/5 [=====] - 0s 6ms/step - loss: 0.5137 - accuracy: 0.7508 - val\_loss: 0.4604 - val\_accuracy: 0.8027  
Epoch 217/1000  
5/5 [=====] - 0s 6ms/step - loss: 0.5118 - accuracy: 0.7476 - val\_loss: 0.4603 - val\_accuracy: 0.8027  
Epoch 218/1000  
5/5 [=====] - 0s 6ms/step - loss: 0.5084 - accuracy: 0.7484 - val\_loss: 0.4601 - val\_accuracy: 0.8027  
Epoch 219/1000  
5/5 [=====] - 0s 6ms/step - loss: 0.5113 - accuracy: 0.7492 - val\_loss: 0.4591 - val\_accuracy: 0.8027  
Epoch 220/1000  
5/5 [=====] - 0s 6ms/step - loss: 0.5056 - accuracy: 0.7484 - val\_loss: 0.4579 - val\_accuracy: 0.8027  
Epoch 221/1000  
5/5 [=====] - 0s 6ms/step - loss: 0.5133 - accuracy: 0.7468 - val\_loss: 0.4568 - val\_accuracy: 0.8027  
Epoch 222/1000  
5/5 [=====] - 0s 6ms/step - loss: 0.5063 - accuracy: 0.7500 - val\_loss: 0.4569 - val\_accuracy: 0.8027  
Epoch 223/1000  
5/5 [=====] - 0s 6ms/step - loss: 0.5065 - accuracy: 0.7492 - val\_loss: 0.4567 - val\_accuracy: 0.8027  
Epoch 224/1000  
5/5 [=====] - 0s 6ms/step - loss: 0.5068 - accuracy: 0.7492 - val\_loss: 0.4558 - val\_accuracy: 0.8027  
Epoch 225/1000  
5/5 [=====] - 0s 6ms/step - loss: 0.5051 - accuracy: 0.7460 - val\_loss: 0.4554 - val\_accuracy: 0.8027  
Epoch 226/1000  
5/5 [=====] - 0s 6ms/step - loss: 0.5027 - accuracy: 0.7460 - val\_loss: 0.4548 - val\_accuracy: 0.8027  
Epoch 227/1000  
5/5 [=====] - 0s 6ms/step - loss: 0.5114 - accuracy: 0.7492 - val\_loss: 0.4534 - val\_accuracy: 0.8027  
Epoch 228/1000  
5/5 [=====] - 0s 6ms/step - loss: 0.5057 - accuracy: 0.7452 - val\_loss: 0.4535 - val\_accuracy: 0.8027  
Epoch 229/1000  
5/5 [=====] - 0s 6ms/step - loss: 0.5013 - accuracy: 0.7516 - val\_loss: 0.4526 - val\_accuracy: 0.8027  
Epoch 230/1000  
5/5 [=====] - 0s 6ms/step - loss: 0.5041 - accuracy: 0.7492 - val\_loss: 0.4522 - val\_accuracy: 0.8027  
Epoch 231/1000  
5/5 [=====] - 0s 6ms/step - loss: 0.5038 - accuracy: 0.7476 - val\_loss: 0.4520 - val\_accuracy: 0.8027  
Epoch 232/1000  
5/5 [=====] - 0s 6ms/step - loss: 0.5022 - accuracy: 0.7444 - val\_loss: 0.4512 - val\_accuracy: 0.8027  
Epoch 233/1000  
5/5 [=====] - 0s 6ms/step - loss: 0.4982 - accuracy: 0.7460 - val\_loss: 0.4510 - val\_accuracy: 0.8027  
Epoch 234/1000  
5/5 [=====] - 0s 6ms/step - loss: 0.5034 - accuracy: 0.7468 - val\_loss: 0.4497 - val\_accuracy: 0.8027  
Epoch 235/1000  
5/5 [=====] - 0s 6ms/step - loss: 0.4989 - accuracy: 0.7396 - val\_loss: 0.4504 - val\_accuracy: 0.8027  
Epoch 236/1000  
5/5 [=====] - 0s 6ms/step - loss: 0.5033 - accuracy: 0.7452 - val\_loss: 0.4494 - val\_accuracy: 0.8027  
Epoch 237/1000  
5/5 [=====] - 0s 6ms/step - loss: 0.4931 - accuracy: 0.7460 - val\_loss: 0.4487 - val\_accuracy: 0.8027  
Epoch 238/1000  
5/5 [=====] - 0s 6ms/step - loss: 0.4958 - accuracy: 0.7468 - val\_loss: 0.4477 - val\_accuracy: 0.8067  
Epoch 239/1000  
5/5 [=====] - 0s 6ms/step - loss: 0.4935 - accuracy: 0.7548 - val\_loss: 0.4473 - val\_accuracy: 0.8091  
Epoch 240/1000  
5/5 [=====] - 0s 6ms/step - loss: 0.4920 - accuracy: 0.7556 - val\_loss: 0.4468 - val\_accuracy: 0.8139

Epoch 241/1000  
5/5 [=====] - 0s 6ms/step - loss: 0.4968 - accuracy: 0.7548 - val\_loss: 0.4459 - val\_accuracy: 0.8163  
Epoch 242/1000  
5/5 [=====] - 0s 6ms/step - loss: 0.4944 - accuracy: 0.7580 - val\_loss: 0.4458 - val\_accuracy: 0.8195  
Epoch 243/1000  
5/5 [=====] - 0s 6ms/step - loss: 0.4989 - accuracy: 0.7588 - val\_loss: 0.4457 - val\_accuracy: 0.8187  
Epoch 244/1000  
5/5 [=====] - 0s 6ms/step - loss: 0.4876 - accuracy: 0.7644 - val\_loss: 0.4452 - val\_accuracy: 0.8275  
Epoch 245/1000  
5/5 [=====] - 0s 6ms/step - loss: 0.5009 - accuracy: 0.7636 - val\_loss: 0.4447 - val\_accuracy: 0.8315  
Epoch 246/1000  
5/5 [=====] - 0s 6ms/step - loss: 0.4861 - accuracy: 0.7676 - val\_loss: 0.4438 - val\_accuracy: 0.8379  
Epoch 247/1000  
5/5 [=====] - 0s 6ms/step - loss: 0.4931 - accuracy: 0.7716 - val\_loss: 0.4443 - val\_accuracy: 0.8363  
Epoch 248/1000  
5/5 [=====] - 0s 6ms/step - loss: 0.4897 - accuracy: 0.7819 - val\_loss: 0.4438 - val\_accuracy: 0.8371  
Epoch 249/1000  
5/5 [=====] - 0s 6ms/step - loss: 0.4918 - accuracy: 0.7796 - val\_loss: 0.4432 - val\_accuracy: 0.8379  
Epoch 250/1000  
5/5 [=====] - 0s 6ms/step - loss: 0.4944 - accuracy: 0.7796 - val\_loss: 0.4425 - val\_accuracy: 0.8387  
Epoch 251/1000  
5/5 [=====] - 0s 6ms/step - loss: 0.4890 - accuracy: 0.7859 - val\_loss: 0.4414 - val\_accuracy: 0.8395  
Epoch 252/1000  
5/5 [=====] - 0s 6ms/step - loss: 0.4853 - accuracy: 0.7827 - val\_loss: 0.4413 - val\_accuracy: 0.8435  
Epoch 253/1000  
5/5 [=====] - 0s 6ms/step - loss: 0.4998 - accuracy: 0.7724 - val\_loss: 0.4403 - val\_accuracy: 0.8442  
Epoch 254/1000  
5/5 [=====] - 0s 6ms/step - loss: 0.4831 - accuracy: 0.7875 - val\_loss: 0.4400 - val\_accuracy: 0.8442  
Epoch 255/1000  
5/5 [=====] - 0s 6ms/step - loss: 0.4873 - accuracy: 0.7859 - val\_loss: 0.4391 - val\_accuracy: 0.8466  
Epoch 256/1000  
5/5 [=====] - 0s 6ms/step - loss: 0.4837 - accuracy: 0.7947 - val\_loss: 0.4395 - val\_accuracy: 0.8450  
Epoch 257/1000  
5/5 [=====] - 0s 6ms/step - loss: 0.4875 - accuracy: 0.7891 - val\_loss: 0.4396 - val\_accuracy: 0.8482  
Epoch 258/1000  
5/5 [=====] - 0s 6ms/step - loss: 0.4766 - accuracy: 0.7939 - val\_loss: 0.4393 - val\_accuracy: 0.8474  
Epoch 259/1000  
5/5 [=====] - 0s 6ms/step - loss: 0.4918 - accuracy: 0.7891 - val\_loss: 0.4379 - val\_accuracy: 0.8474  
Epoch 260/1000  
5/5 [=====] - 0s 6ms/step - loss: 0.4890 - accuracy: 0.7891 - val\_loss: 0.4383 - val\_accuracy: 0.8474  
Epoch 261/1000  
5/5 [=====] - 0s 6ms/step - loss: 0.4809 - accuracy: 0.7955 - val\_loss: 0.4368 - val\_accuracy: 0.8482  
Epoch 262/1000  
5/5 [=====] - 0s 6ms/step - loss: 0.4789 - accuracy: 0.7963 - val\_loss: 0.4368 - val\_accuracy: 0.8474  
Epoch 263/1000  
5/5 [=====] - 0s 6ms/step - loss: 0.4847 - accuracy: 0.7971 - val\_loss: 0.4360 - val\_accuracy: 0.8474  
Epoch 264/1000  
5/5 [=====] - 0s 6ms/step - loss: 0.4859 - accuracy: 0.7963 - val\_loss: 0.4353 - val\_accuracy: 0.8490  
Epoch 265/1000  
5/5 [=====] - 0s 6ms/step - loss: 0.4776 - accuracy: 0.7955 - val\_loss: 0.4356 - val\_accuracy: 0.8490

Epoch 266/1000  
5/5 [=====] - 0s 6ms/step - loss: 0.4822 - accuracy: 0.7963 - val\_loss: 0.4344 - val\_accuracy: 0.8490  
Epoch 267/1000  
5/5 [=====] - 0s 6ms/step - loss: 0.4808 - accuracy: 0.7987 - val\_loss: 0.4353 - val\_accuracy: 0.8498  
Epoch 268/1000  
5/5 [=====] - 0s 6ms/step - loss: 0.4759 - accuracy: 0.7963 - val\_loss: 0.4342 - val\_accuracy: 0.8498  
Epoch 269/1000  
5/5 [=====] - 0s 6ms/step - loss: 0.4804 - accuracy: 0.8075 - val\_loss: 0.4338 - val\_accuracy: 0.8514  
Epoch 270/1000  
5/5 [=====] - 0s 6ms/step - loss: 0.4851 - accuracy: 0.8019 - val\_loss: 0.4338 - val\_accuracy: 0.8514  
Epoch 271/1000  
5/5 [=====] - 0s 6ms/step - loss: 0.4756 - accuracy: 0.7995 - val\_loss: 0.4329 - val\_accuracy: 0.8546  
Epoch 272/1000  
5/5 [=====] - 0s 6ms/step - loss: 0.4759 - accuracy: 0.8051 - val\_loss: 0.4315 - val\_accuracy: 0.8578  
Epoch 273/1000  
5/5 [=====] - 0s 6ms/step - loss: 0.4723 - accuracy: 0.8027 - val\_loss: 0.4315 - val\_accuracy: 0.8578  
Epoch 274/1000  
5/5 [=====] - 0s 6ms/step - loss: 0.4815 - accuracy: 0.8035 - val\_loss: 0.4312 - val\_accuracy: 0.8586  
Epoch 275/1000  
5/5 [=====] - 0s 6ms/step - loss: 0.4782 - accuracy: 0.8035 - val\_loss: 0.4310 - val\_accuracy: 0.8578  
Epoch 276/1000  
5/5 [=====] - 0s 6ms/step - loss: 0.4698 - accuracy: 0.8155 - val\_loss: 0.4310 - val\_accuracy: 0.8586  
Epoch 277/1000  
5/5 [=====] - 0s 6ms/step - loss: 0.4782 - accuracy: 0.8059 - val\_loss: 0.4308 - val\_accuracy: 0.8594  
Epoch 278/1000  
5/5 [=====] - 0s 6ms/step - loss: 0.4785 - accuracy: 0.8075 - val\_loss: 0.4302 - val\_accuracy: 0.8586  
Epoch 279/1000  
5/5 [=====] - 0s 6ms/step - loss: 0.4655 - accuracy: 0.8155 - val\_loss: 0.4299 - val\_accuracy: 0.8602  
Epoch 280/1000  
5/5 [=====] - 0s 6ms/step - loss: 0.4735 - accuracy: 0.8019 - val\_loss: 0.4290 - val\_accuracy: 0.8602  
Epoch 281/1000  
5/5 [=====] - 0s 6ms/step - loss: 0.4686 - accuracy: 0.8091 - val\_loss: 0.4287 - val\_accuracy: 0.8602  
Epoch 282/1000  
5/5 [=====] - 0s 6ms/step - loss: 0.4716 - accuracy: 0.8075 - val\_loss: 0.4286 - val\_accuracy: 0.8602  
Epoch 283/1000  
5/5 [=====] - 0s 6ms/step - loss: 0.4809 - accuracy: 0.8035 - val\_loss: 0.4277 - val\_accuracy: 0.8666  
Epoch 284/1000  
5/5 [=====] - 0s 6ms/step - loss: 0.4687 - accuracy: 0.8131 - val\_loss: 0.4289 - val\_accuracy: 0.8602  
Epoch 285/1000  
5/5 [=====] - 0s 6ms/step - loss: 0.4729 - accuracy: 0.8131 - val\_loss: 0.4275 - val\_accuracy: 0.8602  
Epoch 286/1000  
5/5 [=====] - 0s 6ms/step - loss: 0.4694 - accuracy: 0.8099 - val\_loss: 0.4266 - val\_accuracy: 0.8602  
Epoch 287/1000  
5/5 [=====] - 0s 6ms/step - loss: 0.4646 - accuracy: 0.8107 - val\_loss: 0.4271 - val\_accuracy: 0.8618  
Epoch 288/1000  
5/5 [=====] - 0s 6ms/step - loss: 0.4706 - accuracy: 0.8171 - val\_loss: 0.4256 - val\_accuracy: 0.8602  
Epoch 289/1000  
5/5 [=====] - 0s 6ms/step - loss: 0.4719 - accuracy: 0.8107 - val\_loss: 0.4253 - val\_accuracy: 0.8602  
Epoch 290/1000  
5/5 [=====] - 0s 6ms/step - loss: 0.4648 - accuracy: 0.8091 - val\_loss: 0.4247 - val\_accuracy: 0.8610

Epoch 291/1000  
5/5 [=====] - 0s 6ms/step - loss: 0.4707 - accuracy: 0.8115 - val\_loss: 0.4244 - val\_accuracy: 0.8642  
Epoch 292/1000  
5/5 [=====] - 0s 6ms/step - loss: 0.4584 - accuracy: 0.8171 - val\_loss: 0.4244 - val\_accuracy: 0.8610  
Epoch 293/1000  
5/5 [=====] - 0s 6ms/step - loss: 0.4648 - accuracy: 0.8091 - val\_loss: 0.4234 - val\_accuracy: 0.8682  
Epoch 294/1000  
5/5 [=====] - 0s 6ms/step - loss: 0.4635 - accuracy: 0.8123 - val\_loss: 0.4227 - val\_accuracy: 0.8666  
Epoch 295/1000  
5/5 [=====] - 0s 6ms/step - loss: 0.4664 - accuracy: 0.8203 - val\_loss: 0.4226 - val\_accuracy: 0.8634  
Epoch 296/1000  
5/5 [=====] - 0s 6ms/step - loss: 0.4676 - accuracy: 0.8059 - val\_loss: 0.4223 - val\_accuracy: 0.8666  
Epoch 297/1000  
5/5 [=====] - 0s 6ms/step - loss: 0.4622 - accuracy: 0.8179 - val\_loss: 0.4229 - val\_accuracy: 0.8618  
Epoch 298/1000  
5/5 [=====] - 0s 6ms/step - loss: 0.4705 - accuracy: 0.8107 - val\_loss: 0.4226 - val\_accuracy: 0.8690  
Epoch 299/1000  
5/5 [=====] - 0s 6ms/step - loss: 0.4667 - accuracy: 0.8179 - val\_loss: 0.4228 - val\_accuracy: 0.8682  
Epoch 300/1000  
5/5 [=====] - 0s 6ms/step - loss: 0.4639 - accuracy: 0.8195 - val\_loss: 0.4214 - val\_accuracy: 0.8666  
Epoch 301/1000  
5/5 [=====] - 0s 6ms/step - loss: 0.4608 - accuracy: 0.8203 - val\_loss: 0.4213 - val\_accuracy: 0.8634  
Epoch 302/1000  
5/5 [=====] - 0s 6ms/step - loss: 0.4632 - accuracy: 0.8163 - val\_loss: 0.4206 - val\_accuracy: 0.8650  
Epoch 303/1000  
5/5 [=====] - 0s 6ms/step - loss: 0.4622 - accuracy: 0.8099 - val\_loss: 0.4205 - val\_accuracy: 0.8714  
Epoch 304/1000  
5/5 [=====] - 0s 6ms/step - loss: 0.4642 - accuracy: 0.8203 - val\_loss: 0.4202 - val\_accuracy: 0.8658  
Epoch 305/1000  
5/5 [=====] - 0s 6ms/step - loss: 0.4611 - accuracy: 0.8155 - val\_loss: 0.4203 - val\_accuracy: 0.8642  
Epoch 306/1000  
5/5 [=====] - 0s 6ms/step - loss: 0.4603 - accuracy: 0.8171 - val\_loss: 0.4199 - val\_accuracy: 0.8642  
Epoch 307/1000  
5/5 [=====] - 0s 6ms/step - loss: 0.4615 - accuracy: 0.8195 - val\_loss: 0.4196 - val\_accuracy: 0.8642  
Epoch 308/1000  
5/5 [=====] - 0s 6ms/step - loss: 0.4584 - accuracy: 0.8227 - val\_loss: 0.4189 - val\_accuracy: 0.8634  
Epoch 309/1000  
5/5 [=====] - 0s 6ms/step - loss: 0.4625 - accuracy: 0.8155 - val\_loss: 0.4188 - val\_accuracy: 0.8706  
Epoch 310/1000  
5/5 [=====] - 0s 6ms/step - loss: 0.4508 - accuracy: 0.8243 - val\_loss: 0.4184 - val\_accuracy: 0.8698  
Epoch 311/1000  
5/5 [=====] - 0s 6ms/step - loss: 0.4638 - accuracy: 0.8155 - val\_loss: 0.4186 - val\_accuracy: 0.8698  
Epoch 312/1000  
5/5 [=====] - 0s 6ms/step - loss: 0.4611 - accuracy: 0.8139 - val\_loss: 0.4179 - val\_accuracy: 0.8698  
Epoch 313/1000  
5/5 [=====] - 0s 6ms/step - loss: 0.4559 - accuracy: 0.8203 - val\_loss: 0.4169 - val\_accuracy: 0.8666  
Epoch 314/1000  
5/5 [=====] - 0s 6ms/step - loss: 0.4533 - accuracy: 0.8259 - val\_loss: 0.4170 - val\_accuracy: 0.8650  
Epoch 315/1000  
5/5 [=====] - 0s 6ms/step - loss: 0.4668 - accuracy: 0.8099 - val\_loss: 0.4162 - val\_accuracy: 0.8690



Epoch 316/1000  
5/5 [=====] - 0s 6ms/step - loss: 0.4582 - accuracy: 0.8211 - val\_loss: 0.4169 - val\_accuracy: 0.8650  
Epoch 317/1000  
5/5 [=====] - 0s 6ms/step - loss: 0.4590 - accuracy: 0.8131 - val\_loss: 0.4163 - val\_accuracy: 0.8658  
Epoch 318/1000  
5/5 [=====] - 0s 6ms/step - loss: 0.4575 - accuracy: 0.8091 - val\_loss: 0.4153 - val\_accuracy: 0.8658  
Epoch 319/1000  
5/5 [=====] - 0s 6ms/step - loss: 0.4502 - accuracy: 0.8155 - val\_loss: 0.4148 - val\_accuracy: 0.8698  
Epoch 320/1000  
5/5 [=====] - 0s 6ms/step - loss: 0.4566 - accuracy: 0.8203 - val\_loss: 0.4148 - val\_accuracy: 0.8706  
Epoch 321/1000  
5/5 [=====] - 0s 6ms/step - loss: 0.4528 - accuracy: 0.8211 - val\_loss: 0.4140 - val\_accuracy: 0.8650  
Epoch 322/1000  
5/5 [=====] - 0s 6ms/step - loss: 0.4547 - accuracy: 0.8195 - val\_loss: 0.4137 - val\_accuracy: 0.8650  
Epoch 323/1000  
5/5 [=====] - 0s 6ms/step - loss: 0.4460 - accuracy: 0.8267 - val\_loss: 0.4144 - val\_accuracy: 0.8658  
Epoch 324/1000  
5/5 [=====] - 0s 6ms/step - loss: 0.4590 - accuracy: 0.8107 - val\_loss: 0.4136 - val\_accuracy: 0.8658  
Epoch 325/1000  
5/5 [=====] - 0s 6ms/step - loss: 0.4539 - accuracy: 0.8227 - val\_loss: 0.4138 - val\_accuracy: 0.8666  
Epoch 326/1000  
5/5 [=====] - 0s 6ms/step - loss: 0.4429 - accuracy: 0.8235 - val\_loss: 0.4128 - val\_accuracy: 0.8666  
Epoch 327/1000  
5/5 [=====] - 0s 6ms/step - loss: 0.4449 - accuracy: 0.8291 - val\_loss: 0.4126 - val\_accuracy: 0.8674  
Epoch 328/1000  
5/5 [=====] - 0s 6ms/step - loss: 0.4552 - accuracy: 0.8211 - val\_loss: 0.4124 - val\_accuracy: 0.8658  
Epoch 329/1000  
5/5 [=====] - 0s 6ms/step - loss: 0.4563 - accuracy: 0.8131 - val\_loss: 0.4117 - val\_accuracy: 0.8658  
Epoch 330/1000  
5/5 [=====] - 0s 6ms/step - loss: 0.4507 - accuracy: 0.8235 - val\_loss: 0.4106 - val\_accuracy: 0.8658  
Epoch 331/1000  
5/5 [=====] - 0s 6ms/step - loss: 0.4447 - accuracy: 0.8347 - val\_loss: 0.4128 - val\_accuracy: 0.8666  
Epoch 332/1000  
5/5 [=====] - 0s 6ms/step - loss: 0.4526 - accuracy: 0.8187 - val\_loss: 0.4097 - val\_accuracy: 0.8674  
Epoch 333/1000  
5/5 [=====] - 0s 6ms/step - loss: 0.4437 - accuracy: 0.8315 - val\_loss: 0.4087 - val\_accuracy: 0.8666  
Epoch 334/1000  
5/5 [=====] - 0s 6ms/step - loss: 0.4467 - accuracy: 0.8299 - val\_loss: 0.4096 - val\_accuracy: 0.8658  
Epoch 335/1000  
5/5 [=====] - 0s 6ms/step - loss: 0.4517 - accuracy: 0.8187 - val\_loss: 0.4087 - val\_accuracy: 0.8674  
Epoch 336/1000  
5/5 [=====] - 0s 6ms/step - loss: 0.4374 - accuracy: 0.8275 - val\_loss: 0.4098 - val\_accuracy: 0.8674  
Epoch 337/1000  
5/5 [=====] - 0s 6ms/step - loss: 0.4536 - accuracy: 0.8147 - val\_loss: 0.4085 - val\_accuracy: 0.8666  
Epoch 338/1000  
5/5 [=====] - 0s 6ms/step - loss: 0.4481 - accuracy: 0.8267 - val\_loss: 0.4088 - val\_accuracy: 0.8674  
Epoch 339/1000  
5/5 [=====] - 0s 6ms/step - loss: 0.4517 - accuracy: 0.8219 - val\_loss: 0.4086 - val\_accuracy: 0.8666  
Epoch 340/1000  
5/5 [=====] - 0s 6ms/step - loss: 0.4424 - accuracy: 0.8235 - val\_loss: 0.4080 - val\_accuracy: 0.8682

Epoch 341/1000  
5/5 [=====] - 0s 6ms/step - loss: 0.4499 - accuracy: 0.8291 - val\_loss: 0.4076 - val\_accuracy: 0.8682  
Epoch 342/1000  
5/5 [=====] - 0s 6ms/step - loss: 0.4488 - accuracy: 0.8219 - val\_loss: 0.4083 - val\_accuracy: 0.8674  
Epoch 343/1000  
5/5 [=====] - 0s 6ms/step - loss: 0.4509 - accuracy: 0.8211 - val\_loss: 0.4073 - val\_accuracy: 0.8666  
Epoch 344/1000  
5/5 [=====] - 0s 6ms/step - loss: 0.4464 - accuracy: 0.8203 - val\_loss: 0.4074 - val\_accuracy: 0.8666  
Epoch 345/1000  
5/5 [=====] - 0s 6ms/step - loss: 0.4498 - accuracy: 0.8187 - val\_loss: 0.4059 - val\_accuracy: 0.8674  
Epoch 346/1000  
5/5 [=====] - 0s 6ms/step - loss: 0.4460 - accuracy: 0.8267 - val\_loss: 0.4059 - val\_accuracy: 0.8690  
Epoch 347/1000  
5/5 [=====] - 0s 6ms/step - loss: 0.4418 - accuracy: 0.8259 - val\_loss: 0.4064 - val\_accuracy: 0.8698  
Epoch 348/1000  
5/5 [=====] - 0s 6ms/step - loss: 0.4441 - accuracy: 0.8227 - val\_loss: 0.4066 - val\_accuracy: 0.8690  
Epoch 349/1000  
5/5 [=====] - 0s 6ms/step - loss: 0.4431 - accuracy: 0.8307 - val\_loss: 0.4053 - val\_accuracy: 0.8690  
Epoch 350/1000  
5/5 [=====] - 0s 6ms/step - loss: 0.4406 - accuracy: 0.8283 - val\_loss: 0.4050 - val\_accuracy: 0.8690  
Epoch 351/1000  
5/5 [=====] - 0s 6ms/step - loss: 0.4419 - accuracy: 0.8315 - val\_loss: 0.4056 - val\_accuracy: 0.8690  
Epoch 352/1000  
5/5 [=====] - 0s 6ms/step - loss: 0.4440 - accuracy: 0.8171 - val\_loss: 0.4057 - val\_accuracy: 0.8698  
Epoch 353/1000  
5/5 [=====] - 0s 6ms/step - loss: 0.4401 - accuracy: 0.8259 - val\_loss: 0.4048 - val\_accuracy: 0.8698  
Epoch 354/1000  
5/5 [=====] - 0s 6ms/step - loss: 0.4373 - accuracy: 0.8331 - val\_loss: 0.4050 - val\_accuracy: 0.8706  
Epoch 355/1000  
5/5 [=====] - 0s 6ms/step - loss: 0.4408 - accuracy: 0.8307 - val\_loss: 0.4042 - val\_accuracy: 0.8682  
Epoch 356/1000  
5/5 [=====] - 0s 6ms/step - loss: 0.4443 - accuracy: 0.8235 - val\_loss: 0.4032 - val\_accuracy: 0.8690  
Epoch 357/1000  
5/5 [=====] - 0s 6ms/step - loss: 0.4317 - accuracy: 0.8403 - val\_loss: 0.4040 - val\_accuracy: 0.8682  
Epoch 358/1000  
5/5 [=====] - 0s 6ms/step - loss: 0.4511 - accuracy: 0.8243 - val\_loss: 0.4034 - val\_accuracy: 0.8698  
Epoch 359/1000  
5/5 [=====] - 0s 6ms/step - loss: 0.4390 - accuracy: 0.8299 - val\_loss: 0.4037 - val\_accuracy: 0.8706  
Epoch 360/1000  
5/5 [=====] - 0s 6ms/step - loss: 0.4442 - accuracy: 0.8307 - val\_loss: 0.4019 - val\_accuracy: 0.8706  
Epoch 361/1000  
5/5 [=====] - 0s 6ms/step - loss: 0.4375 - accuracy: 0.8347 - val\_loss: 0.4015 - val\_accuracy: 0.8706  
Epoch 362/1000  
5/5 [=====] - 0s 6ms/step - loss: 0.4344 - accuracy: 0.8347 - val\_loss: 0.4012 - val\_accuracy: 0.8706  
Epoch 363/1000  
5/5 [=====] - 0s 6ms/step - loss: 0.4380 - accuracy: 0.8363 - val\_loss: 0.4013 - val\_accuracy: 0.8706  
Epoch 364/1000  
5/5 [=====] - 0s 6ms/step - loss: 0.4349 - accuracy: 0.8307 - val\_loss: 0.4011 - val\_accuracy: 0.8714  
Epoch 365/1000  
5/5 [=====] - 0s 6ms/step - loss: 0.4382 - accuracy: 0.8323 - val\_loss: 0.4028 - val\_accuracy: 0.8698

Epoch 366/1000  
5/5 [=====] - 0s 6ms/step - loss: 0.4317 - accuracy: 0.8339 - val\_loss: 0.4011 - val\_accuracy: 0.8706  
Epoch 367/1000  
5/5 [=====] - 0s 6ms/step - loss: 0.4381 - accuracy: 0.8211 - val\_loss: 0.4021 - val\_accuracy: 0.8706  
Epoch 368/1000  
5/5 [=====] - 0s 6ms/step - loss: 0.4408 - accuracy: 0.8315 - val\_loss: 0.4008 - val\_accuracy: 0.8690  
Epoch 369/1000  
5/5 [=====] - 0s 6ms/step - loss: 0.4372 - accuracy: 0.8347 - val\_loss: 0.3994 - val\_accuracy: 0.8722  
Epoch 370/1000  
5/5 [=====] - 0s 6ms/step - loss: 0.4309 - accuracy: 0.8331 - val\_loss: 0.4011 - val\_accuracy: 0.8722  
Epoch 371/1000  
5/5 [=====] - 0s 6ms/step - loss: 0.4287 - accuracy: 0.8379 - val\_loss: 0.4014 - val\_accuracy: 0.8698  
Epoch 372/1000  
5/5 [=====] - 0s 6ms/step - loss: 0.4450 - accuracy: 0.8283 - val\_loss: 0.4004 - val\_accuracy: 0.8714  
Epoch 373/1000  
5/5 [=====] - 0s 6ms/step - loss: 0.4378 - accuracy: 0.8299 - val\_loss: 0.3999 - val\_accuracy: 0.8698  
Epoch 374/1000  
5/5 [=====] - 0s 6ms/step - loss: 0.4331 - accuracy: 0.8315 - val\_loss: 0.3978 - val\_accuracy: 0.8698  
Epoch 375/1000  
5/5 [=====] - 0s 6ms/step - loss: 0.4258 - accuracy: 0.8427 - val\_loss: 0.3988 - val\_accuracy: 0.8698  
Epoch 376/1000  
5/5 [=====] - 0s 7ms/step - loss: 0.4257 - accuracy: 0.8347 - val\_loss: 0.3974 - val\_accuracy: 0.8706  
Epoch 377/1000  
5/5 [=====] - 0s 6ms/step - loss: 0.4281 - accuracy: 0.8347 - val\_loss: 0.3981 - val\_accuracy: 0.8706  
Epoch 378/1000  
5/5 [=====] - 0s 6ms/step - loss: 0.4294 - accuracy: 0.8347 - val\_loss: 0.3984 - val\_accuracy: 0.8706  
Epoch 379/1000  
5/5 [=====] - 0s 6ms/step - loss: 0.4318 - accuracy: 0.8283 - val\_loss: 0.3975 - val\_accuracy: 0.8714  
Epoch 380/1000  
5/5 [=====] - 0s 6ms/step - loss: 0.4308 - accuracy: 0.8339 - val\_loss: 0.3988 - val\_accuracy: 0.8690  
Epoch 381/1000  
5/5 [=====] - 0s 7ms/step - loss: 0.4367 - accuracy: 0.8299 - val\_loss: 0.3974 - val\_accuracy: 0.8722  
Epoch 382/1000  
5/5 [=====] - 0s 6ms/step - loss: 0.4264 - accuracy: 0.8363 - val\_loss: 0.3985 - val\_accuracy: 0.8714  
Epoch 383/1000  
5/5 [=====] - 0s 6ms/step - loss: 0.4357 - accuracy: 0.8347 - val\_loss: 0.3968 - val\_accuracy: 0.8714  
Epoch 384/1000  
5/5 [=====] - 0s 6ms/step - loss: 0.4313 - accuracy: 0.8363 - val\_loss: 0.3967 - val\_accuracy: 0.8714  
Epoch 385/1000  
5/5 [=====] - 0s 6ms/step - loss: 0.4260 - accuracy: 0.8442 - val\_loss: 0.3957 - val\_accuracy: 0.8722  
Epoch 386/1000  
5/5 [=====] - 0s 6ms/step - loss: 0.4275 - accuracy: 0.8379 - val\_loss: 0.3953 - val\_accuracy: 0.8714  
Epoch 387/1000  
5/5 [=====] - 0s 6ms/step - loss: 0.4259 - accuracy: 0.8403 - val\_loss: 0.3947 - val\_accuracy: 0.8746  
Epoch 388/1000  
5/5 [=====] - 0s 6ms/step - loss: 0.4177 - accuracy: 0.8411 - val\_loss: 0.3943 - val\_accuracy: 0.8722  
Epoch 389/1000  
5/5 [=====] - 0s 6ms/step - loss: 0.4319 - accuracy: 0.8355 - val\_loss: 0.3952 - val\_accuracy: 0.8714  
Epoch 390/1000  
5/5 [=====] - 0s 6ms/step - loss: 0.4300 - accuracy: 0.8347 - val\_loss: 0.3955 - val\_accuracy: 0.8722

Epoch 391/1000  
5/5 [=====] - 0s 6ms/step - loss: 0.4246 - accuracy: 0.8387 - val\_loss: 0.3959 - val\_accuracy: 0.8706  
Epoch 392/1000  
5/5 [=====] - 0s 6ms/step - loss: 0.4171 - accuracy: 0.8538 - val\_loss: 0.3949 - val\_accuracy: 0.8730  
Epoch 393/1000  
5/5 [=====] - 0s 6ms/step - loss: 0.4132 - accuracy: 0.8450 - val\_loss: 0.3945 - val\_accuracy: 0.8746  
Epoch 394/1000  
5/5 [=====] - 0s 6ms/step - loss: 0.4236 - accuracy: 0.8450 - val\_loss: 0.3929 - val\_accuracy: 0.8746  
Epoch 395/1000  
5/5 [=====] - 0s 6ms/step - loss: 0.4214 - accuracy: 0.8371 - val\_loss: 0.3940 - val\_accuracy: 0.8746  
Epoch 396/1000  
5/5 [=====] - 0s 6ms/step - loss: 0.4228 - accuracy: 0.8435 - val\_loss: 0.3949 - val\_accuracy: 0.8738  
Epoch 397/1000  
5/5 [=====] - 0s 6ms/step - loss: 0.4188 - accuracy: 0.8427 - val\_loss: 0.3924 - val\_accuracy: 0.8754  
Epoch 398/1000  
5/5 [=====] - 0s 6ms/step - loss: 0.4217 - accuracy: 0.8395 - val\_loss: 0.3920 - val\_accuracy: 0.8778  
Epoch 399/1000  
5/5 [=====] - 0s 6ms/step - loss: 0.4239 - accuracy: 0.8419 - val\_loss: 0.3923 - val\_accuracy: 0.8762  
Epoch 400/1000  
5/5 [=====] - 0s 6ms/step - loss: 0.4183 - accuracy: 0.8458 - val\_loss: 0.3935 - val\_accuracy: 0.8738  
Epoch 401/1000  
5/5 [=====] - 0s 6ms/step - loss: 0.4175 - accuracy: 0.8442 - val\_loss: 0.3918 - val\_accuracy: 0.8746  
Epoch 402/1000  
5/5 [=====] - 0s 6ms/step - loss: 0.4153 - accuracy: 0.8450 - val\_loss: 0.3920 - val\_accuracy: 0.8746  
Epoch 403/1000  
5/5 [=====] - 0s 6ms/step - loss: 0.4266 - accuracy: 0.8371 - val\_loss: 0.3921 - val\_accuracy: 0.8762  
Epoch 404/1000  
5/5 [=====] - 0s 6ms/step - loss: 0.4216 - accuracy: 0.8442 - val\_loss: 0.3941 - val\_accuracy: 0.8730  
Epoch 405/1000  
5/5 [=====] - 0s 6ms/step - loss: 0.4182 - accuracy: 0.8474 - val\_loss: 0.3915 - val\_accuracy: 0.8754  
Epoch 406/1000  
5/5 [=====] - 0s 6ms/step - loss: 0.4215 - accuracy: 0.8482 - val\_loss: 0.3915 - val\_accuracy: 0.8746  
Epoch 407/1000  
5/5 [=====] - 0s 6ms/step - loss: 0.4244 - accuracy: 0.8387 - val\_loss: 0.3928 - val\_accuracy: 0.8754  
Epoch 408/1000  
5/5 [=====] - 0s 6ms/step - loss: 0.4210 - accuracy: 0.8442 - val\_loss: 0.3896 - val\_accuracy: 0.8754  
Epoch 409/1000  
5/5 [=====] - 0s 6ms/step - loss: 0.4089 - accuracy: 0.8506 - val\_loss: 0.3909 - val\_accuracy: 0.8754  
Epoch 410/1000  
5/5 [=====] - 0s 6ms/step - loss: 0.4217 - accuracy: 0.8411 - val\_loss: 0.3907 - val\_accuracy: 0.8746  
Epoch 411/1000  
5/5 [=====] - 0s 6ms/step - loss: 0.4195 - accuracy: 0.8419 - val\_loss: 0.3889 - val\_accuracy: 0.8746  
Epoch 412/1000  
5/5 [=====] - 0s 6ms/step - loss: 0.4105 - accuracy: 0.8506 - val\_loss: 0.3886 - val\_accuracy: 0.8754  
Epoch 413/1000  
5/5 [=====] - 0s 6ms/step - loss: 0.4173 - accuracy: 0.8403 - val\_loss: 0.3898 - val\_accuracy: 0.8746  
Epoch 414/1000  
5/5 [=====] - 0s 6ms/step - loss: 0.4158 - accuracy: 0.8522 - val\_loss: 0.3885 - val\_accuracy: 0.8746  
Epoch 415/1000  
5/5 [=====] - 0s 6ms/step - loss: 0.4122 - accuracy: 0.8450 - val\_loss: 0.3909 - val\_accuracy: 0.8738

Epoch 416/1000  
5/5 [=====] - 0s 6ms/step - loss: 0.4219 - accuracy: 0.8435 - val\_loss: 0.3894 - val\_accuracy: 0.8754  
Epoch 417/1000  
5/5 [=====] - 0s 6ms/step - loss: 0.4151 - accuracy: 0.8474 - val\_loss: 0.3904 - val\_accuracy: 0.8746  
Epoch 418/1000  
5/5 [=====] - 0s 6ms/step - loss: 0.4219 - accuracy: 0.8411 - val\_loss: 0.3878 - val\_accuracy: 0.8770  
Epoch 419/1000  
5/5 [=====] - 0s 6ms/step - loss: 0.4083 - accuracy: 0.8554 - val\_loss: 0.3912 - val\_accuracy: 0.8746  
Epoch 420/1000  
5/5 [=====] - 0s 6ms/step - loss: 0.4154 - accuracy: 0.8522 - val\_loss: 0.3903 - val\_accuracy: 0.8746  
Epoch 421/1000  
5/5 [=====] - 0s 6ms/step - loss: 0.4072 - accuracy: 0.8514 - val\_loss: 0.3874 - val\_accuracy: 0.8738  
Epoch 422/1000  
5/5 [=====] - 0s 6ms/step - loss: 0.4097 - accuracy: 0.8490 - val\_loss: 0.3881 - val\_accuracy: 0.8738  
Epoch 423/1000  
5/5 [=====] - 0s 6ms/step - loss: 0.4060 - accuracy: 0.8442 - val\_loss: 0.3880 - val\_accuracy: 0.8738  
Epoch 424/1000  
5/5 [=====] - 0s 6ms/step - loss: 0.4236 - accuracy: 0.8466 - val\_loss: 0.3876 - val\_accuracy: 0.8762  
Epoch 425/1000  
5/5 [=====] - 0s 6ms/step - loss: 0.4057 - accuracy: 0.8610 - val\_loss: 0.3885 - val\_accuracy: 0.8746  
Epoch 426/1000  
5/5 [=====] - 0s 6ms/step - loss: 0.4202 - accuracy: 0.8474 - val\_loss: 0.3881 - val\_accuracy: 0.8762  
Epoch 427/1000  
5/5 [=====] - 0s 6ms/step - loss: 0.4066 - accuracy: 0.8586 - val\_loss: 0.3875 - val\_accuracy: 0.8762  
Epoch 428/1000  
5/5 [=====] - 0s 6ms/step - loss: 0.4224 - accuracy: 0.8458 - val\_loss: 0.3869 - val\_accuracy: 0.8818  
Epoch 429/1000  
5/5 [=====] - 0s 6ms/step - loss: 0.4043 - accuracy: 0.8618 - val\_loss: 0.3873 - val\_accuracy: 0.8754  
Epoch 430/1000  
5/5 [=====] - 0s 6ms/step - loss: 0.4078 - accuracy: 0.8530 - val\_loss: 0.3875 - val\_accuracy: 0.8770  
Epoch 431/1000  
5/5 [=====] - 0s 6ms/step - loss: 0.4118 - accuracy: 0.8530 - val\_loss: 0.3873 - val\_accuracy: 0.8770  
Epoch 432/1000  
5/5 [=====] - 0s 6ms/step - loss: 0.4098 - accuracy: 0.8530 - val\_loss: 0.3865 - val\_accuracy: 0.8762  
Epoch 433/1000  
5/5 [=====] - 0s 6ms/step - loss: 0.4076 - accuracy: 0.8522 - val\_loss: 0.3871 - val\_accuracy: 0.8762  
Epoch 434/1000  
5/5 [=====] - 0s 6ms/step - loss: 0.4142 - accuracy: 0.8466 - val\_loss: 0.3850 - val\_accuracy: 0.8778  
Epoch 435/1000  
5/5 [=====] - 0s 6ms/step - loss: 0.4091 - accuracy: 0.8514 - val\_loss: 0.3853 - val\_accuracy: 0.8794  
Epoch 436/1000  
5/5 [=====] - 0s 6ms/step - loss: 0.4026 - accuracy: 0.8610 - val\_loss: 0.3861 - val\_accuracy: 0.8762  
Epoch 437/1000  
5/5 [=====] - 0s 6ms/step - loss: 0.3988 - accuracy: 0.8586 - val\_loss: 0.3846 - val\_accuracy: 0.8786  
Epoch 438/1000  
5/5 [=====] - 0s 6ms/step - loss: 0.3929 - accuracy: 0.8618 - val\_loss: 0.3850 - val\_accuracy: 0.8770  
Epoch 439/1000  
5/5 [=====] - 0s 6ms/step - loss: 0.4045 - accuracy: 0.8530 - val\_loss: 0.3843 - val\_accuracy: 0.8770  
Epoch 440/1000  
5/5 [=====] - 0s 6ms/step - loss: 0.4021 - accuracy: 0.8666 - val\_loss: 0.3841 - val\_accuracy: 0.8770

Epoch 441/1000  
5/5 [=====] - 0s 6ms/step - loss: 0.4062 - accuracy: 0.8498 - val\_loss: 0.3845 - val\_accuracy: 0.8778  
Epoch 442/1000  
5/5 [=====] - 0s 6ms/step - loss: 0.4032 - accuracy: 0.8538 - val\_loss: 0.3840 - val\_accuracy: 0.8778  
Epoch 443/1000  
5/5 [=====] - 0s 6ms/step - loss: 0.4125 - accuracy: 0.8442 - val\_loss: 0.3854 - val\_accuracy: 0.8778  
Epoch 444/1000  
5/5 [=====] - 0s 6ms/step - loss: 0.4097 - accuracy: 0.8490 - val\_loss: 0.3840 - val\_accuracy: 0.8786  
Epoch 445/1000  
5/5 [=====] - 0s 6ms/step - loss: 0.4022 - accuracy: 0.8578 - val\_loss: 0.3839 - val\_accuracy: 0.8810  
Epoch 446/1000  
5/5 [=====] - 0s 6ms/step - loss: 0.3971 - accuracy: 0.8570 - val\_loss: 0.3847 - val\_accuracy: 0.8786  
Epoch 447/1000  
5/5 [=====] - 0s 6ms/step - loss: 0.4138 - accuracy: 0.8538 - val\_loss: 0.3864 - val\_accuracy: 0.8794  
Epoch 448/1000  
5/5 [=====] - 0s 6ms/step - loss: 0.4126 - accuracy: 0.8498 - val\_loss: 0.3833 - val\_accuracy: 0.8786  
Epoch 449/1000  
5/5 [=====] - 0s 6ms/step - loss: 0.4002 - accuracy: 0.8602 - val\_loss: 0.3825 - val\_accuracy: 0.8786  
Epoch 450/1000  
5/5 [=====] - 0s 6ms/step - loss: 0.3984 - accuracy: 0.8642 - val\_loss: 0.3844 - val\_accuracy: 0.8770  
Epoch 451/1000  
5/5 [=====] - 0s 6ms/step - loss: 0.4096 - accuracy: 0.8522 - val\_loss: 0.3830 - val\_accuracy: 0.8818  
Epoch 452/1000  
5/5 [=====] - 0s 6ms/step - loss: 0.3948 - accuracy: 0.8594 - val\_loss: 0.3830 - val\_accuracy: 0.8786  
Epoch 453/1000  
5/5 [=====] - 0s 6ms/step - loss: 0.4014 - accuracy: 0.8570 - val\_loss: 0.3824 - val\_accuracy: 0.8786  
Epoch 454/1000  
5/5 [=====] - 0s 6ms/step - loss: 0.3940 - accuracy: 0.8626 - val\_loss: 0.3817 - val\_accuracy: 0.8810  
Epoch 455/1000  
5/5 [=====] - 0s 6ms/step - loss: 0.3951 - accuracy: 0.8562 - val\_loss: 0.3826 - val\_accuracy: 0.8794  
Epoch 456/1000  
5/5 [=====] - 0s 6ms/step - loss: 0.3959 - accuracy: 0.8626 - val\_loss: 0.3841 - val\_accuracy: 0.8762  
Epoch 457/1000  
5/5 [=====] - 0s 6ms/step - loss: 0.4069 - accuracy: 0.8482 - val\_loss: 0.3817 - val\_accuracy: 0.8794  
Epoch 458/1000  
5/5 [=====] - 0s 6ms/step - loss: 0.3902 - accuracy: 0.8570 - val\_loss: 0.3840 - val\_accuracy: 0.8778  
Epoch 459/1000  
5/5 [=====] - 0s 6ms/step - loss: 0.4120 - accuracy: 0.8450 - val\_loss: 0.3842 - val\_accuracy: 0.8778  
Epoch 460/1000  
5/5 [=====] - 0s 6ms/step - loss: 0.4054 - accuracy: 0.8546 - val\_loss: 0.3826 - val\_accuracy: 0.8762  
Epoch 461/1000  
5/5 [=====] - 0s 6ms/step - loss: 0.3991 - accuracy: 0.8626 - val\_loss: 0.3844 - val\_accuracy: 0.8778  
Epoch 462/1000  
5/5 [=====] - 0s 6ms/step - loss: 0.3961 - accuracy: 0.8682 - val\_loss: 0.3805 - val\_accuracy: 0.8778  
Epoch 463/1000  
5/5 [=====] - 0s 6ms/step - loss: 0.3937 - accuracy: 0.8594 - val\_loss: 0.3804 - val\_accuracy: 0.8794  
Epoch 464/1000  
5/5 [=====] - 0s 6ms/step - loss: 0.3976 - accuracy: 0.8618 - val\_loss: 0.3811 - val\_accuracy: 0.8786  
Epoch 465/1000  
5/5 [=====] - 0s 6ms/step - loss: 0.3963 - accuracy: 0.8586 - val\_loss: 0.3820 - val\_accuracy: 0.8770

Epoch 466/1000  
5/5 [=====] - 0s 6ms/step - loss: 0.3928 - accuracy: 0.8610 - val\_loss: 0.3814 - val\_accuracy: 0.8778  
Epoch 467/1000  
5/5 [=====] - 0s 6ms/step - loss: 0.3946 - accuracy: 0.8586 - val\_loss: 0.3820 - val\_accuracy: 0.8762  
Epoch 468/1000  
5/5 [=====] - 0s 6ms/step - loss: 0.3956 - accuracy: 0.8594 - val\_loss: 0.3819 - val\_accuracy: 0.8770  
Epoch 469/1000  
5/5 [=====] - 0s 6ms/step - loss: 0.4053 - accuracy: 0.8562 - val\_loss: 0.3807 - val\_accuracy: 0.8786  
Epoch 470/1000  
5/5 [=====] - 0s 6ms/step - loss: 0.3875 - accuracy: 0.8690 - val\_loss: 0.3788 - val\_accuracy: 0.8818  
Epoch 471/1000  
5/5 [=====] - 0s 6ms/step - loss: 0.3828 - accuracy: 0.8642 - val\_loss: 0.3791 - val\_accuracy: 0.8818  
Epoch 472/1000  
5/5 [=====] - 0s 6ms/step - loss: 0.4072 - accuracy: 0.8538 - val\_loss: 0.3793 - val\_accuracy: 0.8778  
Epoch 473/1000  
5/5 [=====] - 0s 6ms/step - loss: 0.3813 - accuracy: 0.8674 - val\_loss: 0.3790 - val\_accuracy: 0.8802  
Epoch 474/1000  
5/5 [=====] - 0s 6ms/step - loss: 0.3930 - accuracy: 0.8610 - val\_loss: 0.3806 - val\_accuracy: 0.8794  
Epoch 475/1000  
5/5 [=====] - 0s 6ms/step - loss: 0.3826 - accuracy: 0.8730 - val\_loss: 0.3777 - val\_accuracy: 0.8786  
Epoch 476/1000  
5/5 [=====] - 0s 6ms/step - loss: 0.3902 - accuracy: 0.8634 - val\_loss: 0.3804 - val\_accuracy: 0.8786  
Epoch 477/1000  
5/5 [=====] - 0s 6ms/step - loss: 0.3973 - accuracy: 0.8570 - val\_loss: 0.3779 - val\_accuracy: 0.8842  
Epoch 478/1000  
5/5 [=====] - 0s 6ms/step - loss: 0.3830 - accuracy: 0.8690 - val\_loss: 0.3796 - val\_accuracy: 0.8778  
Epoch 479/1000  
5/5 [=====] - 0s 7ms/step - loss: 0.3952 - accuracy: 0.8602 - val\_loss: 0.3788 - val\_accuracy: 0.8826  
Epoch 480/1000  
5/5 [=====] - 0s 6ms/step - loss: 0.3906 - accuracy: 0.8658 - val\_loss: 0.3789 - val\_accuracy: 0.8794  
Epoch 481/1000  
5/5 [=====] - 0s 6ms/step - loss: 0.3831 - accuracy: 0.8658 - val\_loss: 0.3791 - val\_accuracy: 0.8810  
Epoch 482/1000  
5/5 [=====] - 0s 6ms/step - loss: 0.3928 - accuracy: 0.8642 - val\_loss: 0.3780 - val\_accuracy: 0.8842  
Epoch 483/1000  
5/5 [=====] - 0s 6ms/step - loss: 0.3866 - accuracy: 0.8674 - val\_loss: 0.3793 - val\_accuracy: 0.8794  
Epoch 484/1000  
5/5 [=====] - 0s 6ms/step - loss: 0.3955 - accuracy: 0.8586 - val\_loss: 0.3768 - val\_accuracy: 0.8834  
Epoch 485/1000  
5/5 [=====] - 0s 6ms/step - loss: 0.3884 - accuracy: 0.8706 - val\_loss: 0.3803 - val\_accuracy: 0.8778  
Epoch 486/1000  
5/5 [=====] - 0s 6ms/step - loss: 0.4073 - accuracy: 0.8514 - val\_loss: 0.3779 - val\_accuracy: 0.8818  
Epoch 487/1000  
5/5 [=====] - 0s 6ms/step - loss: 0.3856 - accuracy: 0.8650 - val\_loss: 0.3763 - val\_accuracy: 0.8810  
Epoch 488/1000  
5/5 [=====] - 0s 6ms/step - loss: 0.3793 - accuracy: 0.8754 - val\_loss: 0.3772 - val\_accuracy: 0.8786  
Epoch 489/1000  
5/5 [=====] - 0s 6ms/step - loss: 0.3910 - accuracy: 0.8626 - val\_loss: 0.3778 - val\_accuracy: 0.8826  
Epoch 490/1000  
5/5 [=====] - 0s 6ms/step - loss: 0.3997 - accuracy: 0.8642 - val\_loss: 0.3775 - val\_accuracy: 0.8810

Epoch 491/1000  
5/5 [=====] - 0s 6ms/step - loss: 0.3845 - accuracy: 0.8650 - val\_loss: 0.3770 - val\_accuracy: 0.8818  
Epoch 492/1000  
5/5 [=====] - 0s 6ms/step - loss: 0.3970 - accuracy: 0.8634 - val\_loss: 0.3771 - val\_accuracy: 0.8810  
Epoch 493/1000  
5/5 [=====] - 0s 6ms/step - loss: 0.3828 - accuracy: 0.8674 - val\_loss: 0.3761 - val\_accuracy: 0.8842  
Epoch 494/1000  
5/5 [=====] - 0s 6ms/step - loss: 0.3921 - accuracy: 0.8634 - val\_loss: 0.3770 - val\_accuracy: 0.8842  
Epoch 495/1000  
5/5 [=====] - 0s 6ms/step - loss: 0.3768 - accuracy: 0.8746 - val\_loss: 0.3801 - val\_accuracy: 0.8810  
Epoch 496/1000  
5/5 [=====] - 0s 6ms/step - loss: 0.3881 - accuracy: 0.8658 - val\_loss: 0.3779 - val\_accuracy: 0.8802  
Epoch 497/1000  
5/5 [=====] - 0s 6ms/step - loss: 0.3989 - accuracy: 0.8586 - val\_loss: 0.3762 - val\_accuracy: 0.8842  
Epoch 498/1000  
5/5 [=====] - 0s 6ms/step - loss: 0.3973 - accuracy: 0.8594 - val\_loss: 0.3790 - val\_accuracy: 0.8786  
Epoch 499/1000  
5/5 [=====] - 0s 6ms/step - loss: 0.3825 - accuracy: 0.8682 - val\_loss: 0.3751 - val\_accuracy: 0.8826  
Epoch 500/1000  
5/5 [=====] - 0s 6ms/step - loss: 0.3768 - accuracy: 0.8778 - val\_loss: 0.3767 - val\_accuracy: 0.8842  
Epoch 501/1000  
5/5 [=====] - 0s 6ms/step - loss: 0.3855 - accuracy: 0.8714 - val\_loss: 0.3772 - val\_accuracy: 0.8794  
Epoch 502/1000  
5/5 [=====] - 0s 6ms/step - loss: 0.3845 - accuracy: 0.8626 - val\_loss: 0.3786 - val\_accuracy: 0.8818  
Epoch 503/1000  
5/5 [=====] - 0s 6ms/step - loss: 0.3879 - accuracy: 0.8618 - val\_loss: 0.3778 - val\_accuracy: 0.8810  
Epoch 504/1000  
5/5 [=====] - 0s 6ms/step - loss: 0.3830 - accuracy: 0.8714 - val\_loss: 0.3748 - val\_accuracy: 0.8826  
Epoch 505/1000  
5/5 [=====] - 0s 6ms/step - loss: 0.3767 - accuracy: 0.8706 - val\_loss: 0.3752 - val\_accuracy: 0.8842  
Epoch 506/1000  
5/5 [=====] - 0s 6ms/step - loss: 0.3758 - accuracy: 0.8794 - val\_loss: 0.3757 - val\_accuracy: 0.8802  
Epoch 507/1000  
5/5 [=====] - 0s 6ms/step - loss: 0.3839 - accuracy: 0.8690 - val\_loss: 0.3746 - val\_accuracy: 0.8810  
Epoch 508/1000  
5/5 [=====] - 0s 6ms/step - loss: 0.3805 - accuracy: 0.8658 - val\_loss: 0.3762 - val\_accuracy: 0.8842  
Epoch 509/1000  
5/5 [=====] - 0s 6ms/step - loss: 0.3854 - accuracy: 0.8666 - val\_loss: 0.3744 - val\_accuracy: 0.8842  
Epoch 510/1000  
5/5 [=====] - 0s 6ms/step - loss: 0.3747 - accuracy: 0.8730 - val\_loss: 0.3771 - val\_accuracy: 0.8834  
Epoch 511/1000  
5/5 [=====] - 0s 6ms/step - loss: 0.3871 - accuracy: 0.8658 - val\_loss: 0.3753 - val\_accuracy: 0.8810  
Epoch 512/1000  
5/5 [=====] - 0s 6ms/step - loss: 0.3865 - accuracy: 0.8706 - val\_loss: 0.3744 - val\_accuracy: 0.8818  
Epoch 513/1000  
5/5 [=====] - 0s 6ms/step - loss: 0.3710 - accuracy: 0.8762 - val\_loss: 0.3735 - val\_accuracy: 0.8834  
Epoch 514/1000  
5/5 [=====] - 0s 6ms/step - loss: 0.3828 - accuracy: 0.8698 - val\_loss: 0.3759 - val\_accuracy: 0.8834  
Epoch 515/1000  
5/5 [=====] - 0s 6ms/step - loss: 0.3730 - accuracy: 0.8770 - val\_loss: 0.3758 - val\_accuracy: 0.8818



Epoch 516/1000  
5/5 [=====] - 0s 6ms/step - loss: 0.3865 - accuracy: 0.8650 - val\_loss: 0.3734 - val\_accuracy: 0.8850  
Epoch 517/1000  
5/5 [=====] - 0s 6ms/step - loss: 0.3790 - accuracy: 0.8690 - val\_loss: 0.3746 - val\_accuracy: 0.8818  
Epoch 518/1000  
5/5 [=====] - 0s 6ms/step - loss: 0.3770 - accuracy: 0.8746 - val\_loss: 0.3758 - val\_accuracy: 0.8826  
Epoch 519/1000  
5/5 [=====] - 0s 6ms/step - loss: 0.3866 - accuracy: 0.8658 - val\_loss: 0.3733 - val\_accuracy: 0.8858  
Epoch 520/1000  
5/5 [=====] - 0s 6ms/step - loss: 0.3804 - accuracy: 0.8658 - val\_loss: 0.3744 - val\_accuracy: 0.8850  
Epoch 521/1000  
5/5 [=====] - 0s 6ms/step - loss: 0.3781 - accuracy: 0.8746 - val\_loss: 0.3752 - val\_accuracy: 0.8850  
Epoch 522/1000  
5/5 [=====] - 0s 6ms/step - loss: 0.3728 - accuracy: 0.8786 - val\_loss: 0.3749 - val\_accuracy: 0.8858  
Epoch 523/1000  
5/5 [=====] - 0s 6ms/step - loss: 0.3726 - accuracy: 0.8746 - val\_loss: 0.3729 - val\_accuracy: 0.8858  
Epoch 524/1000  
5/5 [=====] - 0s 6ms/step - loss: 0.3843 - accuracy: 0.8674 - val\_loss: 0.3740 - val\_accuracy: 0.8826  
Epoch 525/1000  
5/5 [=====] - 0s 6ms/step - loss: 0.3679 - accuracy: 0.8818 - val\_loss: 0.3721 - val\_accuracy: 0.8834  
Epoch 526/1000  
5/5 [=====] - 0s 6ms/step - loss: 0.3734 - accuracy: 0.8714 - val\_loss: 0.3750 - val\_accuracy: 0.8810  
Epoch 527/1000  
5/5 [=====] - 0s 6ms/step - loss: 0.3779 - accuracy: 0.8754 - val\_loss: 0.3766 - val\_accuracy: 0.8842  
Epoch 528/1000  
5/5 [=====] - 0s 6ms/step - loss: 0.3798 - accuracy: 0.8770 - val\_loss: 0.3745 - val\_accuracy: 0.8834  
Epoch 529/1000  
5/5 [=====] - 0s 6ms/step - loss: 0.3835 - accuracy: 0.8674 - val\_loss: 0.3731 - val\_accuracy: 0.8810  
Epoch 530/1000  
5/5 [=====] - 0s 6ms/step - loss: 0.3809 - accuracy: 0.8650 - val\_loss: 0.3728 - val\_accuracy: 0.8858  
Epoch 531/1000  
5/5 [=====] - 0s 6ms/step - loss: 0.3648 - accuracy: 0.8794 - val\_loss: 0.3730 - val\_accuracy: 0.8826  
Epoch 532/1000  
5/5 [=====] - 0s 6ms/step - loss: 0.3708 - accuracy: 0.8722 - val\_loss: 0.3711 - val\_accuracy: 0.8850  
Epoch 533/1000  
5/5 [=====] - 0s 6ms/step - loss: 0.3707 - accuracy: 0.8794 - val\_loss: 0.3739 - val\_accuracy: 0.8818  
Epoch 534/1000  
5/5 [=====] - 0s 6ms/step - loss: 0.3968 - accuracy: 0.8650 - val\_loss: 0.3745 - val\_accuracy: 0.8818  
Epoch 535/1000  
5/5 [=====] - 0s 6ms/step - loss: 0.3712 - accuracy: 0.8722 - val\_loss: 0.3729 - val\_accuracy: 0.8834  
Epoch 536/1000  
5/5 [=====] - 0s 6ms/step - loss: 0.3834 - accuracy: 0.8674 - val\_loss: 0.3757 - val\_accuracy: 0.8818  
Epoch 537/1000  
5/5 [=====] - 0s 6ms/step - loss: 0.3769 - accuracy: 0.8698 - val\_loss: 0.3743 - val\_accuracy: 0.8826  
Epoch 538/1000  
5/5 [=====] - 0s 6ms/step - loss: 0.3900 - accuracy: 0.8650 - val\_loss: 0.3729 - val\_accuracy: 0.8834  
Epoch 539/1000  
5/5 [=====] - 0s 6ms/step - loss: 0.3752 - accuracy: 0.8714 - val\_loss: 0.3688 - val\_accuracy: 0.8898  
Epoch 540/1000  
5/5 [=====] - 0s 6ms/step - loss: 0.3609 - accuracy: 0.8810 - val\_loss: 0.3716 - val\_accuracy: 0.8874

Epoch 541/1000  
5/5 [=====] - 0s 6ms/step - loss: 0.3670 - accuracy: 0.8770 - val\_loss: 0.3724 - val\_accuracy: 0.8826  
Epoch 542/1000  
5/5 [=====] - 0s 6ms/step - loss: 0.3768 - accuracy: 0.8770 - val\_loss: 0.3725 - val\_accuracy: 0.8834  
Epoch 543/1000  
5/5 [=====] - 0s 6ms/step - loss: 0.3908 - accuracy: 0.8634 - val\_loss: 0.3745 - val\_accuracy: 0.8826  
Epoch 544/1000  
5/5 [=====] - 0s 6ms/step - loss: 0.3811 - accuracy: 0.8698 - val\_loss: 0.3713 - val\_accuracy: 0.8834  
Epoch 545/1000  
5/5 [=====] - 0s 6ms/step - loss: 0.3652 - accuracy: 0.8802 - val\_loss: 0.3718 - val\_accuracy: 0.8826  
Epoch 546/1000  
5/5 [=====] - 0s 6ms/step - loss: 0.3865 - accuracy: 0.8650 - val\_loss: 0.3708 - val\_accuracy: 0.8858  
Epoch 547/1000  
5/5 [=====] - 0s 6ms/step - loss: 0.3706 - accuracy: 0.8762 - val\_loss: 0.3703 - val\_accuracy: 0.8842  
Epoch 548/1000  
5/5 [=====] - 0s 6ms/step - loss: 0.3768 - accuracy: 0.8754 - val\_loss: 0.3719 - val\_accuracy: 0.8842  
Epoch 549/1000  
5/5 [=====] - 0s 7ms/step - loss: 0.3798 - accuracy: 0.8738 - val\_loss: 0.3740 - val\_accuracy: 0.8834  
Epoch 550/1000  
5/5 [=====] - 0s 6ms/step - loss: 0.3740 - accuracy: 0.8778 - val\_loss: 0.3727 - val\_accuracy: 0.8834  
Epoch 551/1000  
5/5 [=====] - 0s 6ms/step - loss: 0.3608 - accuracy: 0.8754 - val\_loss: 0.3713 - val\_accuracy: 0.8850  
Epoch 552/1000  
5/5 [=====] - 0s 6ms/step - loss: 0.3719 - accuracy: 0.8706 - val\_loss: 0.3713 - val\_accuracy: 0.8850  
Epoch 553/1000  
5/5 [=====] - 0s 6ms/step - loss: 0.3616 - accuracy: 0.8818 - val\_loss: 0.3705 - val\_accuracy: 0.8842  
Epoch 554/1000  
5/5 [=====] - 0s 6ms/step - loss: 0.3619 - accuracy: 0.8834 - val\_loss: 0.3701 - val\_accuracy: 0.8858  
Epoch 555/1000  
5/5 [=====] - 0s 6ms/step - loss: 0.3723 - accuracy: 0.8722 - val\_loss: 0.3751 - val\_accuracy: 0.8826  
Epoch 556/1000  
5/5 [=====] - 0s 6ms/step - loss: 0.3872 - accuracy: 0.8650 - val\_loss: 0.3717 - val\_accuracy: 0.8834  
Epoch 557/1000  
5/5 [=====] - 0s 6ms/step - loss: 0.3715 - accuracy: 0.8786 - val\_loss: 0.3711 - val\_accuracy: 0.8818  
Epoch 558/1000  
5/5 [=====] - 0s 6ms/step - loss: 0.3705 - accuracy: 0.8826 - val\_loss: 0.3713 - val\_accuracy: 0.8834  
Epoch 559/1000  
5/5 [=====] - 0s 6ms/step - loss: 0.3720 - accuracy: 0.8706 - val\_loss: 0.3688 - val\_accuracy: 0.8858  
Epoch 560/1000  
5/5 [=====] - 0s 6ms/step - loss: 0.3586 - accuracy: 0.8818 - val\_loss: 0.3705 - val\_accuracy: 0.8810  
Epoch 561/1000  
5/5 [=====] - 0s 6ms/step - loss: 0.3739 - accuracy: 0.8658 - val\_loss: 0.3696 - val\_accuracy: 0.8858  
Epoch 562/1000  
5/5 [=====] - 0s 6ms/step - loss: 0.3595 - accuracy: 0.8810 - val\_loss: 0.3673 - val\_accuracy: 0.8882  
Epoch 563/1000  
5/5 [=====] - 0s 6ms/step - loss: 0.3536 - accuracy: 0.8826 - val\_loss: 0.3689 - val\_accuracy: 0.8882  
Epoch 564/1000  
5/5 [=====] - 0s 6ms/step - loss: 0.3611 - accuracy: 0.8818 - val\_loss: 0.3686 - val\_accuracy: 0.8874  
Epoch 565/1000  
5/5 [=====] - 0s 6ms/step - loss: 0.3609 - accuracy: 0.8802 - val\_loss: 0.3695 - val\_accuracy: 0.8874

Epoch 566/1000  
5/5 [=====] - 0s 6ms/step - loss: 0.3733 - accuracy: 0.8762 - val\_loss: 0.3682 - val\_accuracy: 0.8874  
Epoch 567/1000  
5/5 [=====] - 0s 6ms/step - loss: 0.3594 - accuracy: 0.8850 - val\_loss: 0.3728 - val\_accuracy: 0.8850  
Epoch 568/1000  
5/5 [=====] - 0s 6ms/step - loss: 0.3742 - accuracy: 0.8698 - val\_loss: 0.3706 - val\_accuracy: 0.8850  
Epoch 569/1000  
5/5 [=====] - 0s 6ms/step - loss: 0.3639 - accuracy: 0.8842 - val\_loss: 0.3705 - val\_accuracy: 0.8842  
Epoch 570/1000  
5/5 [=====] - 0s 6ms/step - loss: 0.3750 - accuracy: 0.8722 - val\_loss: 0.3711 - val\_accuracy: 0.8850  
Epoch 571/1000  
5/5 [=====] - 0s 6ms/step - loss: 0.3714 - accuracy: 0.8714 - val\_loss: 0.3648 - val\_accuracy: 0.8882  
Epoch 572/1000  
5/5 [=====] - 0s 6ms/step - loss: 0.3664 - accuracy: 0.8818 - val\_loss: 0.3694 - val\_accuracy: 0.8866  
Epoch 573/1000  
5/5 [=====] - 0s 6ms/step - loss: 0.3589 - accuracy: 0.8810 - val\_loss: 0.3702 - val\_accuracy: 0.8834  
Epoch 574/1000  
5/5 [=====] - 0s 6ms/step - loss: 0.3703 - accuracy: 0.8738 - val\_loss: 0.3738 - val\_accuracy: 0.8818  
Epoch 575/1000  
5/5 [=====] - 0s 6ms/step - loss: 0.3650 - accuracy: 0.8658 - val\_loss: 0.3672 - val\_accuracy: 0.8858  
Epoch 576/1000  
5/5 [=====] - 0s 6ms/step - loss: 0.3608 - accuracy: 0.8834 - val\_loss: 0.3705 - val\_accuracy: 0.8826  
Epoch 577/1000  
5/5 [=====] - 0s 6ms/step - loss: 0.3625 - accuracy: 0.8794 - val\_loss: 0.3691 - val\_accuracy: 0.8866  
Epoch 578/1000  
5/5 [=====] - 0s 6ms/step - loss: 0.3652 - accuracy: 0.8778 - val\_loss: 0.3703 - val\_accuracy: 0.8842  
Epoch 579/1000  
5/5 [=====] - 0s 6ms/step - loss: 0.3672 - accuracy: 0.8810 - val\_loss: 0.3704 - val\_accuracy: 0.8874  
Epoch 580/1000  
5/5 [=====] - 0s 6ms/step - loss: 0.3689 - accuracy: 0.8810 - val\_loss: 0.3697 - val\_accuracy: 0.8842  
Epoch 581/1000  
5/5 [=====] - 0s 6ms/step - loss: 0.3620 - accuracy: 0.8834 - val\_loss: 0.3696 - val\_accuracy: 0.8866  
Epoch 582/1000  
5/5 [=====] - 0s 6ms/step - loss: 0.3712 - accuracy: 0.8762 - val\_loss: 0.3716 - val\_accuracy: 0.8826  
Epoch 583/1000  
5/5 [=====] - 0s 6ms/step - loss: 0.3689 - accuracy: 0.8698 - val\_loss: 0.3675 - val\_accuracy: 0.8882  
Epoch 584/1000  
5/5 [=====] - 0s 6ms/step - loss: 0.3557 - accuracy: 0.8818 - val\_loss: 0.3689 - val\_accuracy: 0.8866  
Epoch 585/1000  
5/5 [=====] - 0s 6ms/step - loss: 0.3627 - accuracy: 0.8802 - val\_loss: 0.3727 - val\_accuracy: 0.8826  
Epoch 586/1000  
5/5 [=====] - 0s 6ms/step - loss: 0.3556 - accuracy: 0.8842 - val\_loss: 0.3683 - val\_accuracy: 0.8874  
Epoch 587/1000  
5/5 [=====] - 0s 6ms/step - loss: 0.3596 - accuracy: 0.8882 - val\_loss: 0.3724 - val\_accuracy: 0.8826  
Epoch 588/1000  
5/5 [=====] - 0s 6ms/step - loss: 0.3688 - accuracy: 0.8674 - val\_loss: 0.3710 - val\_accuracy: 0.8858  
Epoch 589/1000  
5/5 [=====] - 0s 6ms/step - loss: 0.3717 - accuracy: 0.8754 - val\_loss: 0.3700 - val\_accuracy: 0.8850  
Epoch 590/1000  
5/5 [=====] - 0s 6ms/step - loss: 0.3569 - accuracy: 0.8794 - val\_loss: 0.3690 - val\_accuracy: 0.8890

Epoch 591/1000  
5/5 [=====] - 0s 6ms/step - loss: 0.3580 - accuracy: 0.8802 - val\_loss: 0.3737 - val\_accuracy: 0.8834  
Epoch 592/1000  
5/5 [=====] - 0s 6ms/step - loss: 0.3716 - accuracy: 0.8722 - val\_loss: 0.3683 - val\_accuracy: 0.8858  
Epoch 593/1000  
5/5 [=====] - 0s 7ms/step - loss: 0.3567 - accuracy: 0.8842 - val\_loss: 0.3676 - val\_accuracy: 0.8882  
Epoch 594/1000  
5/5 [=====] - 0s 7ms/step - loss: 0.3637 - accuracy: 0.8786 - val\_loss: 0.3679 - val\_accuracy: 0.8866  
Epoch 595/1000  
5/5 [=====] - 0s 6ms/step - loss: 0.3636 - accuracy: 0.8802 - val\_loss: 0.3685 - val\_accuracy: 0.8866  
Epoch 596/1000  
5/5 [=====] - 0s 6ms/step - loss: 0.3523 - accuracy: 0.8834 - val\_loss: 0.3702 - val\_accuracy: 0.8842  
Epoch 597/1000  
5/5 [=====] - 0s 6ms/step - loss: 0.3616 - accuracy: 0.8866 - val\_loss: 0.3681 - val\_accuracy: 0.8890  
Epoch 598/1000  
5/5 [=====] - 0s 7ms/step - loss: 0.3614 - accuracy: 0.8738 - val\_loss: 0.3699 - val\_accuracy: 0.8866  
Epoch 599/1000  
5/5 [=====] - 0s 6ms/step - loss: 0.3511 - accuracy: 0.8834 - val\_loss: 0.3711 - val\_accuracy: 0.8818  
Epoch 600/1000  
5/5 [=====] - 0s 6ms/step - loss: 0.3592 - accuracy: 0.8850 - val\_loss: 0.3727 - val\_accuracy: 0.8850  
Epoch 601/1000  
5/5 [=====] - 0s 6ms/step - loss: 0.3651 - accuracy: 0.8818 - val\_loss: 0.3679 - val\_accuracy: 0.8866  
Epoch 602/1000  
5/5 [=====] - 0s 6ms/step - loss: 0.3584 - accuracy: 0.8842 - val\_loss: 0.3685 - val\_accuracy: 0.8882  
Epoch 603/1000  
5/5 [=====] - 0s 6ms/step - loss: 0.3557 - accuracy: 0.8882 - val\_loss: 0.3703 - val\_accuracy: 0.8850  
Epoch 604/1000  
5/5 [=====] - 0s 6ms/step - loss: 0.3562 - accuracy: 0.8818 - val\_loss: 0.3683 - val\_accuracy: 0.8882  
Epoch 605/1000  
5/5 [=====] - 0s 6ms/step - loss: 0.3456 - accuracy: 0.8874 - val\_loss: 0.3707 - val\_accuracy: 0.8882  
Epoch 606/1000  
5/5 [=====] - 0s 6ms/step - loss: 0.3626 - accuracy: 0.8746 - val\_loss: 0.3704 - val\_accuracy: 0.8882  
Epoch 607/1000  
5/5 [=====] - 0s 6ms/step - loss: 0.3691 - accuracy: 0.8746 - val\_loss: 0.3681 - val\_accuracy: 0.8898  
Epoch 608/1000  
5/5 [=====] - 0s 6ms/step - loss: 0.3593 - accuracy: 0.8754 - val\_loss: 0.3689 - val\_accuracy: 0.8882  
Epoch 609/1000  
5/5 [=====] - 0s 6ms/step - loss: 0.3656 - accuracy: 0.8834 - val\_loss: 0.3693 - val\_accuracy: 0.8898  
Epoch 610/1000  
5/5 [=====] - 0s 6ms/step - loss: 0.3641 - accuracy: 0.8722 - val\_loss: 0.3710 - val\_accuracy: 0.8882  
Epoch 611/1000  
5/5 [=====] - 0s 6ms/step - loss: 0.3469 - accuracy: 0.8938 - val\_loss: 0.3669 - val\_accuracy: 0.8882  
Epoch 612/1000  
5/5 [=====] - 0s 6ms/step - loss: 0.3588 - accuracy: 0.8810 - val\_loss: 0.3669 - val\_accuracy: 0.8914  
Epoch 613/1000  
5/5 [=====] - 0s 6ms/step - loss: 0.3611 - accuracy: 0.8802 - val\_loss: 0.3677 - val\_accuracy: 0.8890  
Epoch 614/1000  
5/5 [=====] - 0s 6ms/step - loss: 0.3642 - accuracy: 0.8698 - val\_loss: 0.3730 - val\_accuracy: 0.8858  
Epoch 615/1000  
5/5 [=====] - 0s 6ms/step - loss: 0.3570 - accuracy: 0.8858 - val\_loss: 0.3689 - val\_accuracy: 0.8874

Epoch 616/1000  
5/5 [=====] - 0s 6ms/step - loss: 0.3538 - accuracy: 0.8802 - val\_loss: 0.3688 - val\_accuracy: 0.8882  
Epoch 617/1000  
5/5 [=====] - 0s 6ms/step - loss: 0.3650 - accuracy: 0.8802 - val\_loss: 0.3689 - val\_accuracy: 0.8898  
Epoch 618/1000  
5/5 [=====] - 0s 6ms/step - loss: 0.3450 - accuracy: 0.8970 - val\_loss: 0.3688 - val\_accuracy: 0.8906  
Epoch 619/1000  
5/5 [=====] - 0s 6ms/step - loss: 0.3586 - accuracy: 0.8834 - val\_loss: 0.3677 - val\_accuracy: 0.8874  
Epoch 620/1000  
5/5 [=====] - 0s 6ms/step - loss: 0.3539 - accuracy: 0.8866 - val\_loss: 0.3686 - val\_accuracy: 0.8890  
Epoch 621/1000  
5/5 [=====] - 0s 6ms/step - loss: 0.3556 - accuracy: 0.8834 - val\_loss: 0.3697 - val\_accuracy: 0.8890  
Epoch 622/1000  
5/5 [=====] - 0s 6ms/step - loss: 0.3593 - accuracy: 0.8778 - val\_loss: 0.3708 - val\_accuracy: 0.8874  
Epoch 623/1000  
5/5 [=====] - 0s 6ms/step - loss: 0.3584 - accuracy: 0.8818 - val\_loss: 0.3684 - val\_accuracy: 0.8890  
Epoch 624/1000  
5/5 [=====] - 0s 6ms/step - loss: 0.3505 - accuracy: 0.8850 - val\_loss: 0.3683 - val\_accuracy: 0.8914  
Epoch 625/1000  
5/5 [=====] - 0s 6ms/step - loss: 0.3585 - accuracy: 0.8778 - val\_loss: 0.3719 - val\_accuracy: 0.8866  
Epoch 626/1000  
5/5 [=====] - 0s 6ms/step - loss: 0.3632 - accuracy: 0.8818 - val\_loss: 0.3730 - val\_accuracy: 0.8850  
Epoch 627/1000  
5/5 [=====] - 0s 6ms/step - loss: 0.3558 - accuracy: 0.8762 - val\_loss: 0.3659 - val\_accuracy: 0.8890  
Epoch 628/1000  
5/5 [=====] - 0s 6ms/step - loss: 0.3503 - accuracy: 0.8794 - val\_loss: 0.3708 - val\_accuracy: 0.8858  
Epoch 629/1000  
5/5 [=====] - 0s 6ms/step - loss: 0.3645 - accuracy: 0.8810 - val\_loss: 0.3645 - val\_accuracy: 0.8906  
Epoch 630/1000  
5/5 [=====] - 0s 6ms/step - loss: 0.3414 - accuracy: 0.8906 - val\_loss: 0.3658 - val\_accuracy: 0.8906  
Epoch 631/1000  
5/5 [=====] - 0s 6ms/step - loss: 0.3450 - accuracy: 0.8954 - val\_loss: 0.3670 - val\_accuracy: 0.8890  
Epoch 632/1000  
5/5 [=====] - 0s 6ms/step - loss: 0.3496 - accuracy: 0.8882 - val\_loss: 0.3699 - val\_accuracy: 0.8890  
Epoch 633/1000  
5/5 [=====] - 0s 6ms/step - loss: 0.3431 - accuracy: 0.8890 - val\_loss: 0.3703 - val\_accuracy: 0.8866  
Epoch 634/1000  
5/5 [=====] - 0s 6ms/step - loss: 0.3645 - accuracy: 0.8786 - val\_loss: 0.3661 - val\_accuracy: 0.8914  
Epoch 635/1000  
5/5 [=====] - 0s 6ms/step - loss: 0.3422 - accuracy: 0.8874 - val\_loss: 0.3670 - val\_accuracy: 0.8890  
Epoch 636/1000  
5/5 [=====] - 0s 6ms/step - loss: 0.3437 - accuracy: 0.8858 - val\_loss: 0.3679 - val\_accuracy: 0.8914  
Epoch 637/1000  
5/5 [=====] - 0s 6ms/step - loss: 0.3509 - accuracy: 0.8810 - val\_loss: 0.3701 - val\_accuracy: 0.8914  
Epoch 638/1000  
5/5 [=====] - 0s 6ms/step - loss: 0.3547 - accuracy: 0.8842 - val\_loss: 0.3694 - val\_accuracy: 0.8898  
Epoch 639/1000  
5/5 [=====] - 0s 6ms/step - loss: 0.3418 - accuracy: 0.8826 - val\_loss: 0.3670 - val\_accuracy: 0.8914  
Epoch 640/1000  
5/5 [=====] - 0s 6ms/step - loss: 0.3572 - accuracy: 0.8810 - val\_loss: 0.3724 - val\_accuracy: 0.8890

Epoch 641/1000  
5/5 [=====] - 0s 6ms/step - loss: 0.3491 - accuracy: 0.8890 - val\_loss: 0.3696 - val\_accuracy: 0.8906  
Epoch 642/1000  
5/5 [=====] - 0s 6ms/step - loss: 0.3435 - accuracy: 0.8866 - val\_loss: 0.3632 - val\_accuracy: 0.8922  
Epoch 643/1000  
5/5 [=====] - 0s 6ms/step - loss: 0.3377 - accuracy: 0.8938 - val\_loss: 0.3663 - val\_accuracy: 0.8914  
Epoch 644/1000  
5/5 [=====] - 0s 6ms/step - loss: 0.3474 - accuracy: 0.8898 - val\_loss: 0.3697 - val\_accuracy: 0.8882  
Epoch 645/1000  
5/5 [=====] - 0s 6ms/step - loss: 0.3499 - accuracy: 0.8818 - val\_loss: 0.3648 - val\_accuracy: 0.8914  
Epoch 646/1000  
5/5 [=====] - 0s 6ms/step - loss: 0.3518 - accuracy: 0.8882 - val\_loss: 0.3679 - val\_accuracy: 0.8914  
Epoch 647/1000  
5/5 [=====] - 0s 6ms/step - loss: 0.3530 - accuracy: 0.8818 - val\_loss: 0.3723 - val\_accuracy: 0.8850  
Epoch 648/1000  
5/5 [=====] - 0s 6ms/step - loss: 0.3657 - accuracy: 0.8706 - val\_loss: 0.3689 - val\_accuracy: 0.8906  
Epoch 649/1000  
5/5 [=====] - 0s 6ms/step - loss: 0.3433 - accuracy: 0.8866 - val\_loss: 0.3670 - val\_accuracy: 0.8922  
Epoch 650/1000  
5/5 [=====] - 0s 6ms/step - loss: 0.3391 - accuracy: 0.8898 - val\_loss: 0.3650 - val\_accuracy: 0.8914  
Epoch 651/1000  
5/5 [=====] - 0s 6ms/step - loss: 0.3426 - accuracy: 0.8890 - val\_loss: 0.3662 - val\_accuracy: 0.8914  
Epoch 652/1000  
5/5 [=====] - 0s 6ms/step - loss: 0.3405 - accuracy: 0.8914 - val\_loss: 0.3682 - val\_accuracy: 0.8938  
Epoch 653/1000  
5/5 [=====] - 0s 6ms/step - loss: 0.3499 - accuracy: 0.8898 - val\_loss: 0.3694 - val\_accuracy: 0.8882  
Epoch 654/1000  
5/5 [=====] - 0s 6ms/step - loss: 0.3508 - accuracy: 0.8778 - val\_loss: 0.3684 - val\_accuracy: 0.8914  
Epoch 655/1000  
5/5 [=====] - 0s 6ms/step - loss: 0.3381 - accuracy: 0.8890 - val\_loss: 0.3685 - val\_accuracy: 0.8906  
Epoch 656/1000  
5/5 [=====] - 0s 6ms/step - loss: 0.3468 - accuracy: 0.8890 - val\_loss: 0.3669 - val\_accuracy: 0.8922  
Epoch 657/1000  
5/5 [=====] - 0s 6ms/step - loss: 0.3559 - accuracy: 0.8818 - val\_loss: 0.3707 - val\_accuracy: 0.8906  
Epoch 658/1000  
5/5 [=====] - 0s 6ms/step - loss: 0.3461 - accuracy: 0.8858 - val\_loss: 0.3677 - val\_accuracy: 0.8914  
Epoch 659/1000  
5/5 [=====] - 0s 6ms/step - loss: 0.3475 - accuracy: 0.8906 - val\_loss: 0.3675 - val\_accuracy: 0.8938  
Epoch 660/1000  
5/5 [=====] - 0s 6ms/step - loss: 0.3354 - accuracy: 0.8914 - val\_loss: 0.3703 - val\_accuracy: 0.8882  
Epoch 661/1000  
5/5 [=====] - 0s 6ms/step - loss: 0.3487 - accuracy: 0.8826 - val\_loss: 0.3707 - val\_accuracy: 0.8898  
Epoch 662/1000  
5/5 [=====] - 0s 6ms/step - loss: 0.3520 - accuracy: 0.8834 - val\_loss: 0.3687 - val\_accuracy: 0.8914  
Epoch 663/1000  
5/5 [=====] - 0s 6ms/step - loss: 0.3427 - accuracy: 0.8898 - val\_loss: 0.3708 - val\_accuracy: 0.8898  
Epoch 664/1000  
5/5 [=====] - 0s 6ms/step - loss: 0.3530 - accuracy: 0.8850 - val\_loss: 0.3679 - val\_accuracy: 0.8898  
Epoch 665/1000  
5/5 [=====] - 0s 6ms/step - loss: 0.3351 - accuracy: 0.8922 - val\_loss: 0.3689 - val\_accuracy: 0.8906

Epoch 666/1000  
5/5 [=====] - 0s 6ms/step - loss: 0.3528 - accuracy: 0.8890 - val\_loss: 0.3684 - val\_accuracy: 0.8914  
Epoch 667/1000  
5/5 [=====] - 0s 6ms/step - loss: 0.3526 - accuracy: 0.8882 - val\_loss: 0.3680 - val\_accuracy: 0.8930  
Epoch 668/1000  
5/5 [=====] - 0s 6ms/step - loss: 0.3344 - accuracy: 0.8922 - val\_loss: 0.3678 - val\_accuracy: 0.8890  
Epoch 669/1000  
5/5 [=====] - 0s 6ms/step - loss: 0.3387 - accuracy: 0.8954 - val\_loss: 0.3672 - val\_accuracy: 0.8906  
Epoch 670/1000  
5/5 [=====] - 0s 6ms/step - loss: 0.3320 - accuracy: 0.8922 - val\_loss: 0.3709 - val\_accuracy: 0.8906  
Epoch 671/1000  
5/5 [=====] - 0s 6ms/step - loss: 0.3339 - accuracy: 0.8962 - val\_loss: 0.3667 - val\_accuracy: 0.8914  
Epoch 672/1000  
5/5 [=====] - 0s 6ms/step - loss: 0.3376 - accuracy: 0.8874 - val\_loss: 0.3697 - val\_accuracy: 0.8922  
Epoch 673/1000  
5/5 [=====] - 0s 6ms/step - loss: 0.3470 - accuracy: 0.8826 - val\_loss: 0.3680 - val\_accuracy: 0.8914  
Epoch 674/1000  
5/5 [=====] - 0s 6ms/step - loss: 0.3366 - accuracy: 0.8850 - val\_loss: 0.3700 - val\_accuracy: 0.8882  
Epoch 675/1000  
5/5 [=====] - 0s 6ms/step - loss: 0.3555 - accuracy: 0.8794 - val\_loss: 0.3676 - val\_accuracy: 0.8914  
Epoch 676/1000  
5/5 [=====] - 0s 7ms/step - loss: 0.3388 - accuracy: 0.8922 - val\_loss: 0.3651 - val\_accuracy: 0.8898  
Epoch 677/1000  
5/5 [=====] - 0s 6ms/step - loss: 0.3395 - accuracy: 0.8866 - val\_loss: 0.3701 - val\_accuracy: 0.8914  
Epoch 678/1000  
5/5 [=====] - 0s 6ms/step - loss: 0.3518 - accuracy: 0.8842 - val\_loss: 0.3674 - val\_accuracy: 0.8898  
Epoch 679/1000  
5/5 [=====] - 0s 6ms/step - loss: 0.3434 - accuracy: 0.8922 - val\_loss: 0.3692 - val\_accuracy: 0.8914  
Epoch 680/1000  
5/5 [=====] - 0s 6ms/step - loss: 0.3451 - accuracy: 0.8866 - val\_loss: 0.3631 - val\_accuracy: 0.8914  
Epoch 681/1000  
5/5 [=====] - 0s 6ms/step - loss: 0.3193 - accuracy: 0.9018 - val\_loss: 0.3696 - val\_accuracy: 0.8898  
Epoch 682/1000  
5/5 [=====] - 0s 6ms/step - loss: 0.3645 - accuracy: 0.8802 - val\_loss: 0.3707 - val\_accuracy: 0.8906  
Epoch 683/1000  
5/5 [=====] - 0s 6ms/step - loss: 0.3309 - accuracy: 0.8882 - val\_loss: 0.3694 - val\_accuracy: 0.8914  
Epoch 684/1000  
5/5 [=====] - 0s 6ms/step - loss: 0.3457 - accuracy: 0.8858 - val\_loss: 0.3646 - val\_accuracy: 0.8930  
Epoch 685/1000  
5/5 [=====] - 0s 6ms/step - loss: 0.3323 - accuracy: 0.8994 - val\_loss: 0.3676 - val\_accuracy: 0.8930  
Epoch 686/1000  
5/5 [=====] - 0s 6ms/step - loss: 0.3409 - accuracy: 0.8874 - val\_loss: 0.3667 - val\_accuracy: 0.8914  
Epoch 687/1000  
5/5 [=====] - 0s 6ms/step - loss: 0.3325 - accuracy: 0.8922 - val\_loss: 0.3677 - val\_accuracy: 0.8906  
Epoch 688/1000  
5/5 [=====] - 0s 6ms/step - loss: 0.3432 - accuracy: 0.8930 - val\_loss: 0.3676 - val\_accuracy: 0.8930  
Epoch 689/1000  
5/5 [=====] - 0s 6ms/step - loss: 0.3339 - accuracy: 0.8962 - val\_loss: 0.3680 - val\_accuracy: 0.8930  
Epoch 690/1000  
5/5 [=====] - 0s 6ms/step - loss: 0.3498 - accuracy: 0.8866 - val\_loss: 0.3662 - val\_accuracy: 0.8922

Epoch 691/1000  
5/5 [=====] - 0s 6ms/step - loss: 0.3342 - accuracy: 0.8946 - val\_loss: 0.3654 - val\_accuracy: 0.8922  
Epoch 692/1000  
5/5 [=====] - 0s 6ms/step - loss: 0.3439 - accuracy: 0.8890 - val\_loss: 0.3692 - val\_accuracy: 0.8922  
Epoch 693/1000  
5/5 [=====] - 0s 6ms/step - loss: 0.3347 - accuracy: 0.8946 - val\_loss: 0.3679 - val\_accuracy: 0.8914  
Epoch 694/1000  
5/5 [=====] - 0s 7ms/step - loss: 0.3302 - accuracy: 0.9002 - val\_loss: 0.3743 - val\_accuracy: 0.8874  
Epoch 695/1000  
5/5 [=====] - 0s 6ms/step - loss: 0.3486 - accuracy: 0.8826 - val\_loss: 0.3677 - val\_accuracy: 0.8898  
Epoch 696/1000  
5/5 [=====] - 0s 6ms/step - loss: 0.3334 - accuracy: 0.8922 - val\_loss: 0.3649 - val\_accuracy: 0.8914  
Epoch 697/1000  
5/5 [=====] - 0s 6ms/step - loss: 0.3349 - accuracy: 0.8970 - val\_loss: 0.3697 - val\_accuracy: 0.8898  
Epoch 698/1000  
5/5 [=====] - 0s 6ms/step - loss: 0.3502 - accuracy: 0.8818 - val\_loss: 0.3708 - val\_accuracy: 0.8914  
Epoch 699/1000  
5/5 [=====] - 0s 6ms/step - loss: 0.3273 - accuracy: 0.8962 - val\_loss: 0.3690 - val\_accuracy: 0.8906  
Epoch 700/1000  
5/5 [=====] - 0s 6ms/step - loss: 0.3325 - accuracy: 0.8994 - val\_loss: 0.3656 - val\_accuracy: 0.8922  
Epoch 701/1000  
5/5 [=====] - 0s 6ms/step - loss: 0.3269 - accuracy: 0.8938 - val\_loss: 0.3644 - val\_accuracy: 0.8922  
Epoch 702/1000  
5/5 [=====] - 0s 6ms/step - loss: 0.3269 - accuracy: 0.8954 - val\_loss: 0.3657 - val\_accuracy: 0.8922  
Epoch 703/1000  
5/5 [=====] - 0s 6ms/step - loss: 0.3400 - accuracy: 0.8898 - val\_loss: 0.3683 - val\_accuracy: 0.8922  
Epoch 704/1000  
5/5 [=====] - 0s 6ms/step - loss: 0.3442 - accuracy: 0.8874 - val\_loss: 0.3662 - val\_accuracy: 0.8922  
Epoch 705/1000  
5/5 [=====] - 0s 6ms/step - loss: 0.3314 - accuracy: 0.8922 - val\_loss: 0.3668 - val\_accuracy: 0.8898  
Epoch 706/1000  
5/5 [=====] - 0s 6ms/step - loss: 0.3366 - accuracy: 0.8930 - val\_loss: 0.3704 - val\_accuracy: 0.8906  
Epoch 707/1000  
5/5 [=====] - 0s 6ms/step - loss: 0.3488 - accuracy: 0.8850 - val\_loss: 0.3677 - val\_accuracy: 0.8914  
Epoch 708/1000  
5/5 [=====] - 0s 6ms/step - loss: 0.3352 - accuracy: 0.8946 - val\_loss: 0.3687 - val\_accuracy: 0.8906  
Epoch 709/1000  
5/5 [=====] - 0s 6ms/step - loss: 0.3394 - accuracy: 0.8898 - val\_loss: 0.3735 - val\_accuracy: 0.8914  
Epoch 710/1000  
5/5 [=====] - 0s 6ms/step - loss: 0.3374 - accuracy: 0.8882 - val\_loss: 0.3666 - val\_accuracy: 0.8914  
Epoch 711/1000  
5/5 [=====] - 0s 6ms/step - loss: 0.3256 - accuracy: 0.9010 - val\_loss: 0.3722 - val\_accuracy: 0.8882  
Epoch 712/1000  
5/5 [=====] - 0s 6ms/step - loss: 0.3423 - accuracy: 0.8850 - val\_loss: 0.3682 - val\_accuracy: 0.8922  
Epoch 713/1000  
5/5 [=====] - 0s 6ms/step - loss: 0.3288 - accuracy: 0.8946 - val\_loss: 0.3692 - val\_accuracy: 0.8906  
Epoch 714/1000  
5/5 [=====] - 0s 6ms/step - loss: 0.3245 - accuracy: 0.8978 - val\_loss: 0.3729 - val\_accuracy: 0.8890  
Epoch 715/1000  
5/5 [=====] - 0s 6ms/step - loss: 0.3460 - accuracy: 0.8898 - val\_loss: 0.3701 - val\_accuracy: 0.8906



Epoch 716/1000  
5/5 [=====] - 0s 6ms/step - loss: 0.3236 - accuracy: 0.8978 - val\_loss: 0.3697 - val\_accuracy: 0.8914  
Epoch 717/1000  
5/5 [=====] - 0s 6ms/step - loss: 0.3378 - accuracy: 0.8922 - val\_loss: 0.3696 - val\_accuracy: 0.8914  
Epoch 718/1000  
5/5 [=====] - 0s 6ms/step - loss: 0.3395 - accuracy: 0.8882 - val\_loss: 0.3696 - val\_accuracy: 0.8898  
Epoch 719/1000  
5/5 [=====] - 0s 6ms/step - loss: 0.3364 - accuracy: 0.8930 - val\_loss: 0.3654 - val\_accuracy: 0.8922  
Epoch 720/1000  
5/5 [=====] - 0s 6ms/step - loss: 0.3287 - accuracy: 0.9002 - val\_loss: 0.3694 - val\_accuracy: 0.8898  
Epoch 721/1000  
5/5 [=====] - 0s 6ms/step - loss: 0.3433 - accuracy: 0.8826 - val\_loss: 0.3690 - val\_accuracy: 0.8898  
Epoch 722/1000  
5/5 [=====] - 0s 6ms/step - loss: 0.3439 - accuracy: 0.8834 - val\_loss: 0.3654 - val\_accuracy: 0.8922  
Epoch 723/1000  
5/5 [=====] - 0s 6ms/step - loss: 0.3290 - accuracy: 0.8970 - val\_loss: 0.3672 - val\_accuracy: 0.8930  
Epoch 724/1000  
5/5 [=====] - 0s 6ms/step - loss: 0.3323 - accuracy: 0.8866 - val\_loss: 0.3699 - val\_accuracy: 0.8906  
Epoch 725/1000  
5/5 [=====] - 0s 6ms/step - loss: 0.3315 - accuracy: 0.8978 - val\_loss: 0.3679 - val\_accuracy: 0.8914  
Epoch 726/1000  
5/5 [=====] - 0s 6ms/step - loss: 0.3295 - accuracy: 0.8938 - val\_loss: 0.3655 - val\_accuracy: 0.8938  
Epoch 727/1000  
5/5 [=====] - 0s 6ms/step - loss: 0.3357 - accuracy: 0.8906 - val\_loss: 0.3683 - val\_accuracy: 0.8938  
Epoch 728/1000  
5/5 [=====] - 0s 6ms/step - loss: 0.3201 - accuracy: 0.9034 - val\_loss: 0.3715 - val\_accuracy: 0.8906  
Epoch 729/1000  
5/5 [=====] - 0s 6ms/step - loss: 0.3293 - accuracy: 0.8930 - val\_loss: 0.3717 - val\_accuracy: 0.8898  
Epoch 730/1000  
5/5 [=====] - 0s 6ms/step - loss: 0.3362 - accuracy: 0.8858 - val\_loss: 0.3701 - val\_accuracy: 0.8922  
Epoch 731/1000  
5/5 [=====] - 0s 6ms/step - loss: 0.3254 - accuracy: 0.8994 - val\_loss: 0.3691 - val\_accuracy: 0.8906  
Epoch 732/1000  
5/5 [=====] - 0s 6ms/step - loss: 0.3425 - accuracy: 0.8882 - val\_loss: 0.3740 - val\_accuracy: 0.8898  
Epoch 733/1000  
5/5 [=====] - 0s 6ms/step - loss: 0.3418 - accuracy: 0.8906 - val\_loss: 0.3667 - val\_accuracy: 0.8922  
Epoch 734/1000  
5/5 [=====] - 0s 6ms/step - loss: 0.3197 - accuracy: 0.9034 - val\_loss: 0.3624 - val\_accuracy: 0.8962  
Epoch 735/1000  
5/5 [=====] - 0s 6ms/step - loss: 0.3235 - accuracy: 0.9018 - val\_loss: 0.3722 - val\_accuracy: 0.8922  
Epoch 736/1000  
5/5 [=====] - 0s 6ms/step - loss: 0.3345 - accuracy: 0.8890 - val\_loss: 0.3695 - val\_accuracy: 0.8930  
Epoch 737/1000  
5/5 [=====] - 0s 6ms/step - loss: 0.3316 - accuracy: 0.8898 - val\_loss: 0.3760 - val\_accuracy: 0.8882  
Epoch 738/1000  
5/5 [=====] - 0s 6ms/step - loss: 0.3462 - accuracy: 0.8826 - val\_loss: 0.3705 - val\_accuracy: 0.8922  
Epoch 739/1000  
5/5 [=====] - 0s 6ms/step - loss: 0.3303 - accuracy: 0.8970 - val\_loss: 0.3727 - val\_accuracy: 0.8930  
Epoch 740/1000  
5/5 [=====] - 0s 6ms/step - loss: 0.3351 - accuracy: 0.8914 - val\_loss: 0.3710 - val\_accuracy: 0.8914

Epoch 741/1000  
5/5 [=====] - 0s 6ms/step - loss: 0.3354 - accuracy: 0.8922 - val\_loss: 0.3714 - val\_accuracy: 0.8938  
Epoch 742/1000  
5/5 [=====] - 0s 6ms/step - loss: 0.3425 - accuracy: 0.8874 - val\_loss: 0.3676 - val\_accuracy: 0.8922  
Epoch 743/1000  
5/5 [=====] - 0s 6ms/step - loss: 0.3300 - accuracy: 0.8938 - val\_loss: 0.3692 - val\_accuracy: 0.8930  
Epoch 744/1000  
5/5 [=====] - 0s 6ms/step - loss: 0.3338 - accuracy: 0.8898 - val\_loss: 0.3692 - val\_accuracy: 0.8930  
Epoch 745/1000  
5/5 [=====] - 0s 6ms/step - loss: 0.3333 - accuracy: 0.8930 - val\_loss: 0.3681 - val\_accuracy: 0.8922  
Epoch 746/1000  
5/5 [=====] - 0s 6ms/step - loss: 0.3301 - accuracy: 0.8938 - val\_loss: 0.3652 - val\_accuracy: 0.8946  
Epoch 747/1000  
5/5 [=====] - 0s 6ms/step - loss: 0.3198 - accuracy: 0.9002 - val\_loss: 0.3689 - val\_accuracy: 0.8906  
Epoch 748/1000  
5/5 [=====] - 0s 6ms/step - loss: 0.3268 - accuracy: 0.8978 - val\_loss: 0.3666 - val\_accuracy: 0.8930  
Epoch 749/1000  
5/5 [=====] - 0s 6ms/step - loss: 0.3126 - accuracy: 0.8978 - val\_loss: 0.3651 - val\_accuracy: 0.8922  
Epoch 750/1000  
5/5 [=====] - 0s 6ms/step - loss: 0.3281 - accuracy: 0.8938 - val\_loss: 0.3715 - val\_accuracy: 0.8898  
Epoch 751/1000  
5/5 [=====] - 0s 6ms/step - loss: 0.3363 - accuracy: 0.8858 - val\_loss: 0.3647 - val\_accuracy: 0.8930  
Epoch 752/1000  
5/5 [=====] - 0s 6ms/step - loss: 0.3182 - accuracy: 0.9018 - val\_loss: 0.3717 - val\_accuracy: 0.8938  
Epoch 753/1000  
5/5 [=====] - 0s 6ms/step - loss: 0.3216 - accuracy: 0.9042 - val\_loss: 0.3729 - val\_accuracy: 0.8914  
Epoch 754/1000  
5/5 [=====] - 0s 6ms/step - loss: 0.3391 - accuracy: 0.8858 - val\_loss: 0.3695 - val\_accuracy: 0.8922  
Epoch 755/1000  
5/5 [=====] - 0s 6ms/step - loss: 0.3270 - accuracy: 0.8994 - val\_loss: 0.3662 - val\_accuracy: 0.8954  
Epoch 756/1000  
5/5 [=====] - 0s 6ms/step - loss: 0.3311 - accuracy: 0.8978 - val\_loss: 0.3698 - val\_accuracy: 0.8938  
Epoch 757/1000  
5/5 [=====] - 0s 6ms/step - loss: 0.3423 - accuracy: 0.8898 - val\_loss: 0.3677 - val\_accuracy: 0.8954  
Epoch 758/1000  
5/5 [=====] - 0s 6ms/step - loss: 0.3295 - accuracy: 0.8938 - val\_loss: 0.3665 - val\_accuracy: 0.8930  
Epoch 759/1000  
5/5 [=====] - 0s 6ms/step - loss: 0.3338 - accuracy: 0.8898 - val\_loss: 0.3692 - val\_accuracy: 0.8922  
Epoch 760/1000  
5/5 [=====] - 0s 6ms/step - loss: 0.3281 - accuracy: 0.8946 - val\_loss: 0.3691 - val\_accuracy: 0.8922  
Epoch 761/1000  
5/5 [=====] - 0s 6ms/step - loss: 0.3357 - accuracy: 0.8930 - val\_loss: 0.3710 - val\_accuracy: 0.8906  
Epoch 762/1000  
5/5 [=====] - 0s 6ms/step - loss: 0.3253 - accuracy: 0.8970 - val\_loss: 0.3679 - val\_accuracy: 0.8930  
Epoch 763/1000  
5/5 [=====] - 0s 6ms/step - loss: 0.3240 - accuracy: 0.8962 - val\_loss: 0.3672 - val\_accuracy: 0.8954  
Epoch 764/1000  
5/5 [=====] - 0s 6ms/step - loss: 0.3193 - accuracy: 0.9002 - val\_loss: 0.3676 - val\_accuracy: 0.8930  
Epoch 765/1000  
5/5 [=====] - 0s 6ms/step - loss: 0.3169 - accuracy: 0.8970 - val\_loss: 0.3706 - val\_accuracy: 0.8914

Epoch 766/1000  
5/5 [=====] - 0s 6ms/step - loss: 0.3267 - accuracy: 0.8962 - val\_loss: 0.3711 - val\_accuracy: 0.8938  
Epoch 767/1000  
5/5 [=====] - 0s 6ms/step - loss: 0.3216 - accuracy: 0.9026 - val\_loss: 0.3708 - val\_accuracy: 0.8922  
Epoch 768/1000  
5/5 [=====] - 0s 6ms/step - loss: 0.3421 - accuracy: 0.8786 - val\_loss: 0.3686 - val\_accuracy: 0.8946  
Epoch 769/1000  
5/5 [=====] - 0s 6ms/step - loss: 0.3317 - accuracy: 0.8946 - val\_loss: 0.3657 - val\_accuracy: 0.8938  
Epoch 770/1000  
5/5 [=====] - 0s 6ms/step - loss: 0.3313 - accuracy: 0.8946 - val\_loss: 0.3683 - val\_accuracy: 0.8922  
Epoch 771/1000  
5/5 [=====] - 0s 6ms/step - loss: 0.3231 - accuracy: 0.8978 - val\_loss: 0.3638 - val\_accuracy: 0.8938  
Epoch 772/1000  
5/5 [=====] - 0s 6ms/step - loss: 0.3229 - accuracy: 0.9058 - val\_loss: 0.3698 - val\_accuracy: 0.8922  
Epoch 773/1000  
5/5 [=====] - 0s 6ms/step - loss: 0.3293 - accuracy: 0.8970 - val\_loss: 0.3671 - val\_accuracy: 0.8930  
Epoch 774/1000  
5/5 [=====] - 0s 6ms/step - loss: 0.3252 - accuracy: 0.8970 - val\_loss: 0.3670 - val\_accuracy: 0.8938  
Epoch 775/1000  
5/5 [=====] - 0s 6ms/step - loss: 0.3181 - accuracy: 0.9002 - val\_loss: 0.3755 - val\_accuracy: 0.8914  
Epoch 776/1000  
5/5 [=====] - 0s 6ms/step - loss: 0.3438 - accuracy: 0.8802 - val\_loss: 0.3694 - val\_accuracy: 0.8938  
Epoch 777/1000  
5/5 [=====] - 0s 6ms/step - loss: 0.3161 - accuracy: 0.9026 - val\_loss: 0.3691 - val\_accuracy: 0.8946  
Epoch 778/1000  
5/5 [=====] - 0s 6ms/step - loss: 0.3114 - accuracy: 0.9018 - val\_loss: 0.3689 - val\_accuracy: 0.8930  
Epoch 779/1000  
5/5 [=====] - 0s 6ms/step - loss: 0.3252 - accuracy: 0.9010 - val\_loss: 0.3704 - val\_accuracy: 0.8938  
Epoch 780/1000  
5/5 [=====] - 0s 6ms/step - loss: 0.3327 - accuracy: 0.8930 - val\_loss: 0.3694 - val\_accuracy: 0.8930  
Epoch 781/1000  
5/5 [=====] - 0s 6ms/step - loss: 0.3259 - accuracy: 0.9010 - val\_loss: 0.3650 - val\_accuracy: 0.8938  
Epoch 782/1000  
5/5 [=====] - 0s 6ms/step - loss: 0.3027 - accuracy: 0.9058 - val\_loss: 0.3741 - val\_accuracy: 0.8922  
Epoch 783/1000  
5/5 [=====] - 0s 6ms/step - loss: 0.3265 - accuracy: 0.8978 - val\_loss: 0.3693 - val\_accuracy: 0.8938  
Epoch 784/1000  
5/5 [=====] - 0s 6ms/step - loss: 0.3170 - accuracy: 0.8994 - val\_loss: 0.3677 - val\_accuracy: 0.8930  
Epoch 785/1000  
5/5 [=====] - 0s 6ms/step - loss: 0.3175 - accuracy: 0.8954 - val\_loss: 0.3730 - val\_accuracy: 0.8930  
Epoch 786/1000  
5/5 [=====] - 0s 6ms/step - loss: 0.3272 - accuracy: 0.8970 - val\_loss: 0.3648 - val\_accuracy: 0.8954  
Epoch 787/1000  
5/5 [=====] - 0s 6ms/step - loss: 0.3185 - accuracy: 0.9002 - val\_loss: 0.3719 - val\_accuracy: 0.8930  
Epoch 788/1000  
5/5 [=====] - 0s 6ms/step - loss: 0.3206 - accuracy: 0.8954 - val\_loss: 0.3688 - val\_accuracy: 0.8938  
Epoch 789/1000  
5/5 [=====] - 0s 6ms/step - loss: 0.3122 - accuracy: 0.9073 - val\_loss: 0.3721 - val\_accuracy: 0.8930  
Epoch 790/1000  
5/5 [=====] - 0s 6ms/step - loss: 0.3261 - accuracy: 0.8938 - val\_loss: 0.3726 - val\_accuracy: 0.8938

```
Epoch 791/1000
5/5 [=====] - 0s 6ms/step - loss: 0.3241 - accuracy: 0.8922 - val_loss: 0.3717 - val_accuracy: 0.8922
Epoch 792/1000
5/5 [=====] - 0s 6ms/step - loss: 0.3236 - accuracy: 0.8970 - val_loss: 0.3682 - val_accuracy: 0.8946
Epoch 793/1000
5/5 [=====] - 0s 6ms/step - loss: 0.3187 - accuracy: 0.9042 - val_loss: 0.3692 - val_accuracy: 0.8922
Epoch 794/1000
5/5 [=====] - 0s 6ms/step - loss: 0.3246 - accuracy: 0.9073 - val_loss: 0.3629 - val_accuracy: 0.8962
Epoch 795/1000
5/5 [=====] - 0s 6ms/step - loss: 0.3010 - accuracy: 0.9097 - val_loss: 0.3702 - val_accuracy: 0.8938
Epoch 796/1000
5/5 [=====] - 0s 6ms/step - loss: 0.3239 - accuracy: 0.8970 - val_loss: 0.3699 - val_accuracy: 0.8930
Epoch 797/1000
5/5 [=====] - 0s 6ms/step - loss: 0.3393 - accuracy: 0.8922 - val_loss: 0.3666 - val_accuracy: 0.8962
Epoch 798/1000
5/5 [=====] - 0s 6ms/step - loss: 0.3221 - accuracy: 0.9050 - val_loss: 0.3642 - val_accuracy: 0.8946
Epoch 799/1000
5/5 [=====] - 0s 6ms/step - loss: 0.3217 - accuracy: 0.9010 - val_loss: 0.3696 - val_accuracy: 0.8938
Epoch 800/1000
5/5 [=====] - 0s 6ms/step - loss: 0.3271 - accuracy: 0.8962 - val_loss: 0.3677 - val_accuracy: 0.8938
Epoch 801/1000
5/5 [=====] - 0s 6ms/step - loss: 0.3256 - accuracy: 0.8946 - val_loss: 0.3703 - val_accuracy: 0.8946
Epoch 802/1000
5/5 [=====] - 0s 6ms/step - loss: 0.3201 - accuracy: 0.9065 - val_loss: 0.3748 - val_accuracy: 0.8922
Epoch 803/1000
5/5 [=====] - 0s 6ms/step - loss: 0.3263 - accuracy: 0.8970 - val_loss: 0.3720 - val_accuracy: 0.8930
Epoch 804/1000
5/5 [=====] - 0s 6ms/step - loss: 0.3214 - accuracy: 0.8994 - val_loss: 0.3691 - val_accuracy: 0.8930
Epoch 805/1000
5/5 [=====] - 0s 6ms/step - loss: 0.3269 - accuracy: 0.8914 - val_loss: 0.3664 - val_accuracy: 0.8954
Epoch 806/1000
5/5 [=====] - 0s 6ms/step - loss: 0.3201 - accuracy: 0.8954 - val_loss: 0.3705 - val_accuracy: 0.8938
Epoch 807/1000
5/5 [=====] - 0s 6ms/step - loss: 0.3193 - accuracy: 0.8994 - val_loss: 0.3704 - val_accuracy: 0.8914
Epoch 808/1000
5/5 [=====] - 0s 6ms/step - loss: 0.3327 - accuracy: 0.8890 - val_loss: 0.3741 - val_accuracy: 0.8938
Epoch 809/1000
5/5 [=====] - 0s 6ms/step - loss: 0.3226 - accuracy: 0.8994 - val_loss: 0.3648 - val_accuracy: 0.8938
Epoch 810/1000
5/5 [=====] - 0s 6ms/step - loss: 0.3087 - accuracy: 0.9065 - val_loss: 0.3674 - val_accuracy: 0.8954
Epoch 811/1000
5/5 [=====] - 0s 6ms/step - loss: 0.3079 - accuracy: 0.9034 - val_loss: 0.3691 - val_accuracy: 0.8930
Epoch 812/1000
5/5 [=====] - 0s 6ms/step - loss: 0.3200 - accuracy: 0.9042 - val_loss: 0.3685 - val_accuracy: 0.8946
Epoch 813/1000
5/5 [=====] - 0s 6ms/step - loss: 0.3155 - accuracy: 0.9034 - val_loss: 0.3695 - val_accuracy: 0.8946
Epoch 814/1000
5/5 [=====] - 0s 6ms/step - loss: 0.3165 - accuracy: 0.8970 - val_loss: 0.3739 - val_accuracy: 0.8922
Epoch 815/1000
5/5 [=====] - 0s 6ms/step - loss: 0.3325 - accuracy: 0.8906 - val_loss: 0.3717 - val_accuracy: 0.8954
```

Epoch 816/1000  
5/5 [=====] - 0s 6ms/step - loss: 0.3272 - accuracy: 0.8946 - val\_loss: 0.3666 - val\_accuracy: 0.8954  
Epoch 817/1000  
5/5 [=====] - 0s 6ms/step - loss: 0.3055 - accuracy: 0.9065 - val\_loss: 0.3639 - val\_accuracy: 0.8970  
Epoch 818/1000  
5/5 [=====] - 0s 6ms/step - loss: 0.3040 - accuracy: 0.9105 - val\_loss: 0.3667 - val\_accuracy: 0.8954  
Epoch 819/1000  
5/5 [=====] - 0s 6ms/step - loss: 0.3230 - accuracy: 0.8978 - val\_loss: 0.3667 - val\_accuracy: 0.8954  
Epoch 820/1000  
5/5 [=====] - 0s 6ms/step - loss: 0.2965 - accuracy: 0.9129 - val\_loss: 0.3621 - val\_accuracy: 0.8962  
Epoch 821/1000  
5/5 [=====] - 0s 6ms/step - loss: 0.2905 - accuracy: 0.9105 - val\_loss: 0.3766 - val\_accuracy: 0.8930  
Epoch 822/1000  
5/5 [=====] - 0s 6ms/step - loss: 0.3189 - accuracy: 0.8994 - val\_loss: 0.3689 - val\_accuracy: 0.8954  
Epoch 823/1000  
5/5 [=====] - 0s 6ms/step - loss: 0.3116 - accuracy: 0.9042 - val\_loss: 0.3743 - val\_accuracy: 0.8954  
Epoch 824/1000  
5/5 [=====] - 0s 6ms/step - loss: 0.3399 - accuracy: 0.8906 - val\_loss: 0.3678 - val\_accuracy: 0.8930  
Epoch 825/1000  
5/5 [=====] - 0s 6ms/step - loss: 0.3056 - accuracy: 0.9073 - val\_loss: 0.3724 - val\_accuracy: 0.8938  
Epoch 826/1000  
5/5 [=====] - 0s 6ms/step - loss: 0.3159 - accuracy: 0.9081 - val\_loss: 0.3692 - val\_accuracy: 0.8938  
Epoch 827/1000  
5/5 [=====] - 0s 6ms/step - loss: 0.3215 - accuracy: 0.8954 - val\_loss: 0.3687 - val\_accuracy: 0.8962  
Epoch 828/1000  
5/5 [=====] - 0s 6ms/step - loss: 0.3115 - accuracy: 0.9058 - val\_loss: 0.3653 - val\_accuracy: 0.8970  
Epoch 829/1000  
5/5 [=====] - 0s 6ms/step - loss: 0.3024 - accuracy: 0.9089 - val\_loss: 0.3704 - val\_accuracy: 0.8954  
Epoch 830/1000  
5/5 [=====] - 0s 6ms/step - loss: 0.3256 - accuracy: 0.8954 - val\_loss: 0.3708 - val\_accuracy: 0.8962  
Epoch 831/1000  
5/5 [=====] - 0s 6ms/step - loss: 0.3155 - accuracy: 0.8994 - val\_loss: 0.3710 - val\_accuracy: 0.8954  
Epoch 832/1000  
5/5 [=====] - 0s 6ms/step - loss: 0.3093 - accuracy: 0.9010 - val\_loss: 0.3675 - val\_accuracy: 0.8954  
Epoch 833/1000  
5/5 [=====] - 0s 6ms/step - loss: 0.3164 - accuracy: 0.8970 - val\_loss: 0.3721 - val\_accuracy: 0.8954  
Epoch 834/1000  
5/5 [=====] - 0s 6ms/step - loss: 0.3229 - accuracy: 0.9034 - val\_loss: 0.3751 - val\_accuracy: 0.8938  
Epoch 835/1000  
5/5 [=====] - 0s 6ms/step - loss: 0.3354 - accuracy: 0.8890 - val\_loss: 0.3713 - val\_accuracy: 0.8938  
Epoch 836/1000  
5/5 [=====] - 0s 6ms/step - loss: 0.3146 - accuracy: 0.9065 - val\_loss: 0.3729 - val\_accuracy: 0.8914  
Epoch 837/1000  
5/5 [=====] - 0s 6ms/step - loss: 0.3041 - accuracy: 0.9105 - val\_loss: 0.3712 - val\_accuracy: 0.8946  
Epoch 838/1000  
5/5 [=====] - 0s 6ms/step - loss: 0.3131 - accuracy: 0.9034 - val\_loss: 0.3725 - val\_accuracy: 0.8946  
Epoch 839/1000  
5/5 [=====] - 0s 6ms/step - loss: 0.3167 - accuracy: 0.9026 - val\_loss: 0.3671 - val\_accuracy: 0.8962  
Epoch 840/1000  
5/5 [=====] - 0s 6ms/step - loss: 0.3245 - accuracy: 0.9026 - val\_loss: 0.3674 - val\_accuracy: 0.8962

Epoch 841/1000  
5/5 [=====] - 0s 6ms/step - loss: 0.3073 - accuracy: 0.9105 - val\_loss: 0.3703 - val\_accuracy: 0.8946  
Epoch 842/1000  
5/5 [=====] - 0s 6ms/step - loss: 0.3090 - accuracy: 0.9050 - val\_loss: 0.3676 - val\_accuracy: 0.8954  
Epoch 843/1000  
5/5 [=====] - 0s 6ms/step - loss: 0.3067 - accuracy: 0.9073 - val\_loss: 0.3650 - val\_accuracy: 0.8962  
Epoch 844/1000  
5/5 [=====] - 0s 6ms/step - loss: 0.3176 - accuracy: 0.9010 - val\_loss: 0.3656 - val\_accuracy: 0.8946  
Epoch 845/1000  
5/5 [=====] - 0s 6ms/step - loss: 0.3251 - accuracy: 0.8946 - val\_loss: 0.3684 - val\_accuracy: 0.8954  
Epoch 846/1000  
5/5 [=====] - 0s 6ms/step - loss: 0.3080 - accuracy: 0.9042 - val\_loss: 0.3709 - val\_accuracy: 0.8938  
Epoch 847/1000  
5/5 [=====] - 0s 6ms/step - loss: 0.2957 - accuracy: 0.9137 - val\_loss: 0.3727 - val\_accuracy: 0.8938  
Epoch 848/1000  
5/5 [=====] - 0s 6ms/step - loss: 0.3120 - accuracy: 0.9042 - val\_loss: 0.3690 - val\_accuracy: 0.8962  
Epoch 849/1000  
5/5 [=====] - 0s 6ms/step - loss: 0.3094 - accuracy: 0.9010 - val\_loss: 0.3680 - val\_accuracy: 0.8954  
Epoch 850/1000  
5/5 [=====] - 0s 6ms/step - loss: 0.2976 - accuracy: 0.9137 - val\_loss: 0.3669 - val\_accuracy: 0.8970  
Epoch 851/1000  
5/5 [=====] - 0s 6ms/step - loss: 0.3166 - accuracy: 0.9034 - val\_loss: 0.3686 - val\_accuracy: 0.8954  
Epoch 852/1000  
5/5 [=====] - 0s 6ms/step - loss: 0.3229 - accuracy: 0.8986 - val\_loss: 0.3725 - val\_accuracy: 0.8938  
Epoch 853/1000  
5/5 [=====] - 0s 6ms/step - loss: 0.3056 - accuracy: 0.9113 - val\_loss: 0.3760 - val\_accuracy: 0.8922  
Epoch 854/1000  
5/5 [=====] - 0s 6ms/step - loss: 0.3348 - accuracy: 0.8946 - val\_loss: 0.3684 - val\_accuracy: 0.8962  
Epoch 855/1000  
5/5 [=====] - 0s 6ms/step - loss: 0.3064 - accuracy: 0.9050 - val\_loss: 0.3688 - val\_accuracy: 0.8938  
Epoch 856/1000  
5/5 [=====] - 0s 6ms/step - loss: 0.3074 - accuracy: 0.9113 - val\_loss: 0.3679 - val\_accuracy: 0.8946  
Epoch 857/1000  
5/5 [=====] - 0s 6ms/step - loss: 0.3006 - accuracy: 0.9121 - val\_loss: 0.3731 - val\_accuracy: 0.8938  
Epoch 858/1000  
5/5 [=====] - 0s 6ms/step - loss: 0.3033 - accuracy: 0.9089 - val\_loss: 0.3731 - val\_accuracy: 0.8938  
Epoch 859/1000  
5/5 [=====] - 0s 6ms/step - loss: 0.3184 - accuracy: 0.9081 - val\_loss: 0.3746 - val\_accuracy: 0.8954  
Epoch 860/1000  
5/5 [=====] - 0s 6ms/step - loss: 0.3278 - accuracy: 0.9018 - val\_loss: 0.3748 - val\_accuracy: 0.8906  
Epoch 861/1000  
5/5 [=====] - 0s 6ms/step - loss: 0.3000 - accuracy: 0.9097 - val\_loss: 0.3753 - val\_accuracy: 0.8914  
Epoch 862/1000  
5/5 [=====] - 0s 6ms/step - loss: 0.3097 - accuracy: 0.9113 - val\_loss: 0.3669 - val\_accuracy: 0.8962  
Epoch 863/1000  
5/5 [=====] - 0s 6ms/step - loss: 0.3041 - accuracy: 0.9081 - val\_loss: 0.3693 - val\_accuracy: 0.8954  
Epoch 864/1000  
5/5 [=====] - 0s 6ms/step - loss: 0.3040 - accuracy: 0.9065 - val\_loss: 0.3685 - val\_accuracy: 0.8970  
Epoch 865/1000  
5/5 [=====] - 0s 6ms/step - loss: 0.2955 - accuracy: 0.9193 - val\_loss: 0.3731 - val\_accuracy: 0.8938

Epoch 866/1000  
5/5 [=====] - 0s 6ms/step - loss: 0.3159 - accuracy: 0.9026 - val\_loss: 0.3712 - val\_accuracy: 0.8946  
Epoch 867/1000  
5/5 [=====] - 0s 6ms/step - loss: 0.3068 - accuracy: 0.9129 - val\_loss: 0.3700 - val\_accuracy: 0.8946  
Epoch 868/1000  
5/5 [=====] - 0s 6ms/step - loss: 0.3057 - accuracy: 0.9121 - val\_loss: 0.3666 - val\_accuracy: 0.8970  
Epoch 869/1000  
5/5 [=====] - 0s 6ms/step - loss: 0.3176 - accuracy: 0.9073 - val\_loss: 0.3661 - val\_accuracy: 0.8978  
Epoch 870/1000  
5/5 [=====] - 0s 6ms/step - loss: 0.3000 - accuracy: 0.9145 - val\_loss: 0.3714 - val\_accuracy: 0.8946  
Epoch 871/1000  
5/5 [=====] - 0s 6ms/step - loss: 0.3003 - accuracy: 0.9145 - val\_loss: 0.3701 - val\_accuracy: 0.8962  
Epoch 872/1000  
5/5 [=====] - 0s 6ms/step - loss: 0.2956 - accuracy: 0.9105 - val\_loss: 0.3776 - val\_accuracy: 0.8938  
Epoch 873/1000  
5/5 [=====] - 0s 6ms/step - loss: 0.3221 - accuracy: 0.9050 - val\_loss: 0.3695 - val\_accuracy: 0.8954  
Epoch 874/1000  
5/5 [=====] - 0s 6ms/step - loss: 0.2959 - accuracy: 0.9097 - val\_loss: 0.3677 - val\_accuracy: 0.8954  
Epoch 875/1000  
5/5 [=====] - 0s 6ms/step - loss: 0.3084 - accuracy: 0.9042 - val\_loss: 0.3697 - val\_accuracy: 0.8978  
Epoch 876/1000  
5/5 [=====] - 0s 6ms/step - loss: 0.3109 - accuracy: 0.9042 - val\_loss: 0.3773 - val\_accuracy: 0.8930  
Epoch 877/1000  
5/5 [=====] - 0s 6ms/step - loss: 0.3157 - accuracy: 0.9010 - val\_loss: 0.3742 - val\_accuracy: 0.8938  
Epoch 878/1000  
5/5 [=====] - 0s 6ms/step - loss: 0.3170 - accuracy: 0.9065 - val\_loss: 0.3707 - val\_accuracy: 0.8938  
Epoch 879/1000  
5/5 [=====] - 0s 6ms/step - loss: 0.3139 - accuracy: 0.9121 - val\_loss: 0.3744 - val\_accuracy: 0.8954  
Epoch 880/1000  
5/5 [=====] - 0s 6ms/step - loss: 0.3231 - accuracy: 0.9026 - val\_loss: 0.3726 - val\_accuracy: 0.8954  
Epoch 881/1000  
5/5 [=====] - 0s 6ms/step - loss: 0.3129 - accuracy: 0.9042 - val\_loss: 0.3698 - val\_accuracy: 0.8970  
Epoch 882/1000  
5/5 [=====] - 0s 6ms/step - loss: 0.3070 - accuracy: 0.9026 - val\_loss: 0.3759 - val\_accuracy: 0.8914  
Epoch 883/1000  
5/5 [=====] - 0s 6ms/step - loss: 0.3051 - accuracy: 0.9113 - val\_loss: 0.3726 - val\_accuracy: 0.8946  
Epoch 884/1000  
5/5 [=====] - 0s 6ms/step - loss: 0.3236 - accuracy: 0.9010 - val\_loss: 0.3679 - val\_accuracy: 0.8962  
Epoch 885/1000  
5/5 [=====] - 0s 6ms/step - loss: 0.2965 - accuracy: 0.9129 - val\_loss: 0.3758 - val\_accuracy: 0.8938  
Epoch 886/1000  
5/5 [=====] - 0s 6ms/step - loss: 0.3078 - accuracy: 0.9026 - val\_loss: 0.3719 - val\_accuracy: 0.8930  
Epoch 887/1000  
5/5 [=====] - 0s 6ms/step - loss: 0.3017 - accuracy: 0.9097 - val\_loss: 0.3696 - val\_accuracy: 0.8970  
Epoch 888/1000  
5/5 [=====] - 0s 6ms/step - loss: 0.3023 - accuracy: 0.9105 - val\_loss: 0.3679 - val\_accuracy: 0.8962  
Epoch 889/1000  
5/5 [=====] - 0s 6ms/step - loss: 0.3094 - accuracy: 0.9026 - val\_loss: 0.3719 - val\_accuracy: 0.8930  
Epoch 890/1000  
5/5 [=====] - 0s 6ms/step - loss: 0.2989 - accuracy: 0.9113 - val\_loss: 0.3715 - val\_accuracy: 0.8938

Epoch 891/1000  
5/5 [=====] - 0s 6ms/step - loss: 0.3215 - accuracy: 0.8962 - val\_loss: 0.3715 - val\_accuracy: 0.8970  
Epoch 892/1000  
5/5 [=====] - 0s 6ms/step - loss: 0.3252 - accuracy: 0.9010 - val\_loss: 0.3667 - val\_accuracy: 0.8946  
Epoch 893/1000  
5/5 [=====] - 0s 6ms/step - loss: 0.3075 - accuracy: 0.9113 - val\_loss: 0.3677 - val\_accuracy: 0.8954  
Epoch 894/1000  
5/5 [=====] - 0s 6ms/step - loss: 0.2963 - accuracy: 0.9161 - val\_loss: 0.3714 - val\_accuracy: 0.8970  
Epoch 895/1000  
5/5 [=====] - 0s 6ms/step - loss: 0.3175 - accuracy: 0.9026 - val\_loss: 0.3707 - val\_accuracy: 0.8930  
Epoch 896/1000  
5/5 [=====] - 0s 6ms/step - loss: 0.2994 - accuracy: 0.9145 - val\_loss: 0.3768 - val\_accuracy: 0.8914  
Epoch 897/1000  
5/5 [=====] - 0s 6ms/step - loss: 0.3147 - accuracy: 0.9073 - val\_loss: 0.3716 - val\_accuracy: 0.8930  
Epoch 898/1000  
5/5 [=====] - 0s 6ms/step - loss: 0.3040 - accuracy: 0.9081 - val\_loss: 0.3739 - val\_accuracy: 0.8922  
Epoch 899/1000  
5/5 [=====] - 0s 6ms/step - loss: 0.2982 - accuracy: 0.9081 - val\_loss: 0.3692 - val\_accuracy: 0.8954  
Epoch 900/1000  
5/5 [=====] - 0s 6ms/step - loss: 0.3138 - accuracy: 0.8962 - val\_loss: 0.3687 - val\_accuracy: 0.8946  
Epoch 901/1000  
5/5 [=====] - 0s 6ms/step - loss: 0.3139 - accuracy: 0.8986 - val\_loss: 0.3728 - val\_accuracy: 0.8946  
Epoch 902/1000  
5/5 [=====] - 0s 6ms/step - loss: 0.2959 - accuracy: 0.9161 - val\_loss: 0.3683 - val\_accuracy: 0.8962  
Epoch 903/1000  
5/5 [=====] - 0s 6ms/step - loss: 0.2988 - accuracy: 0.9161 - val\_loss: 0.3724 - val\_accuracy: 0.8938  
Epoch 904/1000  
5/5 [=====] - 0s 6ms/step - loss: 0.3163 - accuracy: 0.9089 - val\_loss: 0.3685 - val\_accuracy: 0.8954  
Epoch 905/1000  
5/5 [=====] - 0s 6ms/step - loss: 0.2952 - accuracy: 0.9121 - val\_loss: 0.3639 - val\_accuracy: 0.8954  
Epoch 906/1000  
5/5 [=====] - 0s 6ms/step - loss: 0.3021 - accuracy: 0.9137 - val\_loss: 0.3736 - val\_accuracy: 0.8938  
Epoch 907/1000  
5/5 [=====] - 0s 6ms/step - loss: 0.3185 - accuracy: 0.9113 - val\_loss: 0.3757 - val\_accuracy: 0.8922  
Epoch 908/1000  
5/5 [=====] - 0s 6ms/step - loss: 0.3013 - accuracy: 0.9113 - val\_loss: 0.3674 - val\_accuracy: 0.8938  
Epoch 909/1000  
5/5 [=====] - 0s 6ms/step - loss: 0.2967 - accuracy: 0.9145 - val\_loss: 0.3716 - val\_accuracy: 0.8946  
Epoch 910/1000  
5/5 [=====] - 0s 6ms/step - loss: 0.3214 - accuracy: 0.8994 - val\_loss: 0.3699 - val\_accuracy: 0.8922  
Epoch 911/1000  
5/5 [=====] - 0s 6ms/step - loss: 0.3022 - accuracy: 0.9161 - val\_loss: 0.3663 - val\_accuracy: 0.8954  
Epoch 912/1000  
5/5 [=====] - 0s 6ms/step - loss: 0.2981 - accuracy: 0.9153 - val\_loss: 0.3733 - val\_accuracy: 0.8930  
Epoch 913/1000  
5/5 [=====] - 0s 6ms/step - loss: 0.3133 - accuracy: 0.9042 - val\_loss: 0.3688 - val\_accuracy: 0.8954  
Epoch 914/1000  
5/5 [=====] - 0s 6ms/step - loss: 0.2999 - accuracy: 0.9161 - val\_loss: 0.3716 - val\_accuracy: 0.8946  
Epoch 915/1000  
5/5 [=====] - 0s 6ms/step - loss: 0.3082 - accuracy: 0.9089 - val\_loss: 0.3707 - val\_accuracy: 0.8938



Epoch 916/1000  
5/5 [=====] - 0s 6ms/step - loss: 0.2951 - accuracy: 0.9177 - val\_loss: 0.3742 - val\_accuracy: 0.8930  
Epoch 917/1000  
5/5 [=====] - 0s 7ms/step - loss: 0.3169 - accuracy: 0.9026 - val\_loss: 0.3730 - val\_accuracy: 0.8938  
Epoch 918/1000  
5/5 [=====] - 0s 6ms/step - loss: 0.3162 - accuracy: 0.9081 - val\_loss: 0.3670 - val\_accuracy: 0.8962  
Epoch 919/1000  
5/5 [=====] - 0s 6ms/step - loss: 0.2964 - accuracy: 0.9145 - val\_loss: 0.3777 - val\_accuracy: 0.8922  
Epoch 920/1000  
5/5 [=====] - 0s 6ms/step - loss: 0.3235 - accuracy: 0.9010 - val\_loss: 0.3706 - val\_accuracy: 0.8938  
Epoch 921/1000  
5/5 [=====] - 0s 6ms/step - loss: 0.2952 - accuracy: 0.9121 - val\_loss: 0.3696 - val\_accuracy: 0.8946  
Epoch 922/1000  
5/5 [=====] - 0s 6ms/step - loss: 0.2961 - accuracy: 0.9193 - val\_loss: 0.3702 - val\_accuracy: 0.8954  
Epoch 923/1000  
5/5 [=====] - 0s 6ms/step - loss: 0.2950 - accuracy: 0.9161 - val\_loss: 0.3736 - val\_accuracy: 0.8970  
Epoch 924/1000  
5/5 [=====] - 0s 6ms/step - loss: 0.3090 - accuracy: 0.9113 - val\_loss: 0.3733 - val\_accuracy: 0.8938  
Epoch 925/1000  
5/5 [=====] - 0s 6ms/step - loss: 0.2971 - accuracy: 0.9113 - val\_loss: 0.3766 - val\_accuracy: 0.8930  
Epoch 926/1000  
5/5 [=====] - 0s 6ms/step - loss: 0.3077 - accuracy: 0.9034 - val\_loss: 0.3702 - val\_accuracy: 0.8954  
Epoch 927/1000  
5/5 [=====] - 0s 6ms/step - loss: 0.3052 - accuracy: 0.9129 - val\_loss: 0.3660 - val\_accuracy: 0.8954  
Epoch 928/1000  
5/5 [=====] - 0s 6ms/step - loss: 0.2937 - accuracy: 0.9129 - val\_loss: 0.3675 - val\_accuracy: 0.8954  
Epoch 929/1000  
5/5 [=====] - 0s 6ms/step - loss: 0.3027 - accuracy: 0.9089 - val\_loss: 0.3755 - val\_accuracy: 0.8930  
Epoch 930/1000  
5/5 [=====] - 0s 6ms/step - loss: 0.3152 - accuracy: 0.9042 - val\_loss: 0.3764 - val\_accuracy: 0.8914  
Epoch 931/1000  
5/5 [=====] - 0s 6ms/step - loss: 0.3106 - accuracy: 0.9058 - val\_loss: 0.3677 - val\_accuracy: 0.8946  
Epoch 932/1000  
5/5 [=====] - 0s 6ms/step - loss: 0.2981 - accuracy: 0.9129 - val\_loss: 0.3657 - val\_accuracy: 0.8954  
Epoch 933/1000  
5/5 [=====] - 0s 6ms/step - loss: 0.2828 - accuracy: 0.9257 - val\_loss: 0.3742 - val\_accuracy: 0.8938  
Epoch 934/1000  
5/5 [=====] - 0s 6ms/step - loss: 0.3328 - accuracy: 0.8946 - val\_loss: 0.3799 - val\_accuracy: 0.8922  
Epoch 935/1000  
5/5 [=====] - 0s 6ms/step - loss: 0.3172 - accuracy: 0.8994 - val\_loss: 0.3730 - val\_accuracy: 0.8938  
Epoch 936/1000  
5/5 [=====] - 0s 6ms/step - loss: 0.2949 - accuracy: 0.9201 - val\_loss: 0.3698 - val\_accuracy: 0.8938  
Epoch 937/1000  
5/5 [=====] - 0s 6ms/step - loss: 0.2920 - accuracy: 0.9177 - val\_loss: 0.3727 - val\_accuracy: 0.8954  
Epoch 938/1000  
5/5 [=====] - 0s 6ms/step - loss: 0.3045 - accuracy: 0.9121 - val\_loss: 0.3733 - val\_accuracy: 0.8914  
Epoch 939/1000  
5/5 [=====] - 0s 6ms/step - loss: 0.3105 - accuracy: 0.9113 - val\_loss: 0.3726 - val\_accuracy: 0.8930  
Epoch 940/1000  
5/5 [=====] - 0s 6ms/step - loss: 0.2952 - accuracy: 0.9137 - val\_loss: 0.3674 - val\_accuracy: 0.8962

```
Epoch 941/1000
5/5 [=====] - 0s 6ms/step - loss: 0.2833 - accuracy: 0.9233 - val_loss: 0.3702 - val_accuracy: 0.8938
Epoch 942/1000
5/5 [=====] - 0s 6ms/step - loss: 0.3119 - accuracy: 0.9010 - val_loss: 0.3721 - val_accuracy: 0.8930
Epoch 943/1000
5/5 [=====] - 0s 6ms/step - loss: 0.2998 - accuracy: 0.9121 - val_loss: 0.3678 - val_accuracy: 0.8946
Epoch 944/1000
5/5 [=====] - 0s 6ms/step - loss: 0.2830 - accuracy: 0.9193 - val_loss: 0.3679 - val_accuracy: 0.8938
Epoch 945/1000
5/5 [=====] - 0s 6ms/step - loss: 0.2932 - accuracy: 0.9185 - val_loss: 0.3706 - val_accuracy: 0.8954
Epoch 946/1000
5/5 [=====] - 0s 6ms/step - loss: 0.2944 - accuracy: 0.9121 - val_loss: 0.3699 - val_accuracy: 0.8946
Epoch 947/1000
5/5 [=====] - 0s 6ms/step - loss: 0.3030 - accuracy: 0.9113 - val_loss: 0.3691 - val_accuracy: 0.8954
Epoch 948/1000
5/5 [=====] - 0s 6ms/step - loss: 0.2801 - accuracy: 0.9257 - val_loss: 0.3640 - val_accuracy: 0.8954
Epoch 949/1000
5/5 [=====] - 0s 6ms/step - loss: 0.2947 - accuracy: 0.9081 - val_loss: 0.3676 - val_accuracy: 0.8938
Epoch 950/1000
5/5 [=====] - 0s 6ms/step - loss: 0.2975 - accuracy: 0.9145 - val_loss: 0.3717 - val_accuracy: 0.8946
Epoch 951/1000
5/5 [=====] - 0s 6ms/step - loss: 0.3035 - accuracy: 0.9089 - val_loss: 0.3739 - val_accuracy: 0.8938
Epoch 952/1000
5/5 [=====] - 0s 6ms/step - loss: 0.3155 - accuracy: 0.9002 - val_loss: 0.3698 - val_accuracy: 0.8938
Epoch 953/1000
5/5 [=====] - 0s 6ms/step - loss: 0.2918 - accuracy: 0.9185 - val_loss: 0.3684 - val_accuracy: 0.8954
Epoch 954/1000
5/5 [=====] - 0s 6ms/step - loss: 0.2862 - accuracy: 0.9161 - val_loss: 0.3731 - val_accuracy: 0.8946
Epoch 955/1000
5/5 [=====] - 0s 6ms/step - loss: 0.2955 - accuracy: 0.9153 - val_loss: 0.3699 - val_accuracy: 0.8938
Epoch 956/1000
5/5 [=====] - 0s 6ms/step - loss: 0.2998 - accuracy: 0.9081 - val_loss: 0.3657 - val_accuracy: 0.8954
Epoch 957/1000
5/5 [=====] - 0s 6ms/step - loss: 0.3170 - accuracy: 0.8978 - val_loss: 0.3695 - val_accuracy: 0.8938
Epoch 958/1000
5/5 [=====] - 0s 6ms/step - loss: 0.2928 - accuracy: 0.9145 - val_loss: 0.3725 - val_accuracy: 0.8930
Epoch 959/1000
5/5 [=====] - 0s 6ms/step - loss: 0.2969 - accuracy: 0.9161 - val_loss: 0.3704 - val_accuracy: 0.8962
Epoch 960/1000
5/5 [=====] - 0s 6ms/step - loss: 0.3039 - accuracy: 0.9089 - val_loss: 0.3675 - val_accuracy: 0.8930
Epoch 961/1000
5/5 [=====] - 0s 6ms/step - loss: 0.2809 - accuracy: 0.9201 - val_loss: 0.3660 - val_accuracy: 0.8922
Epoch 962/1000
5/5 [=====] - 0s 6ms/step - loss: 0.3060 - accuracy: 0.9073 - val_loss: 0.3786 - val_accuracy: 0.8906
Epoch 963/1000
5/5 [=====] - 0s 6ms/step - loss: 0.2968 - accuracy: 0.9161 - val_loss: 0.3743 - val_accuracy: 0.8930
Epoch 964/1000
5/5 [=====] - 0s 6ms/step - loss: 0.2880 - accuracy: 0.9193 - val_loss: 0.3792 - val_accuracy: 0.8890
Epoch 965/1000
5/5 [=====] - 0s 6ms/step - loss: 0.2983 - accuracy: 0.9161 - val_loss: 0.3722 - val_accuracy: 0.8938
```

Epoch 966/1000  
5/5 [=====] - 0s 6ms/step - loss: 0.2949 - accuracy: 0.9058 - val\_loss: 0.3747 - val\_accuracy: 0.8922  
Epoch 967/1000  
5/5 [=====] - 0s 6ms/step - loss: 0.3135 - accuracy: 0.9050 - val\_loss: 0.3787 - val\_accuracy: 0.8882  
Epoch 968/1000  
5/5 [=====] - 0s 6ms/step - loss: 0.3177 - accuracy: 0.9002 - val\_loss: 0.3785 - val\_accuracy: 0.8906  
Epoch 969/1000  
5/5 [=====] - 0s 6ms/step - loss: 0.2994 - accuracy: 0.9129 - val\_loss: 0.3740 - val\_accuracy: 0.8930  
Epoch 970/1000  
5/5 [=====] - 0s 6ms/step - loss: 0.2859 - accuracy: 0.9201 - val\_loss: 0.3686 - val\_accuracy: 0.8938  
Epoch 971/1000  
5/5 [=====] - 0s 6ms/step - loss: 0.2849 - accuracy: 0.9081 - val\_loss: 0.3750 - val\_accuracy: 0.8922  
Epoch 972/1000  
5/5 [=====] - 0s 6ms/step - loss: 0.2903 - accuracy: 0.9113 - val\_loss: 0.3723 - val\_accuracy: 0.8914  
Epoch 973/1000  
5/5 [=====] - 0s 6ms/step - loss: 0.2890 - accuracy: 0.9177 - val\_loss: 0.3708 - val\_accuracy: 0.8914  
Epoch 974/1000  
5/5 [=====] - 0s 6ms/step - loss: 0.3036 - accuracy: 0.9081 - val\_loss: 0.3719 - val\_accuracy: 0.8914  
Epoch 975/1000  
5/5 [=====] - 0s 6ms/step - loss: 0.2945 - accuracy: 0.9209 - val\_loss: 0.3723 - val\_accuracy: 0.8922  
Epoch 976/1000  
5/5 [=====] - 0s 8ms/step - loss: 0.3084 - accuracy: 0.9105 - val\_loss: 0.3775 - val\_accuracy: 0.8922  
Epoch 977/1000  
5/5 [=====] - 0s 7ms/step - loss: 0.2966 - accuracy: 0.9081 - val\_loss: 0.3755 - val\_accuracy: 0.8922  
Epoch 978/1000  
5/5 [=====] - 0s 6ms/step - loss: 0.2997 - accuracy: 0.9137 - val\_loss: 0.3733 - val\_accuracy: 0.8906  
Epoch 979/1000  
5/5 [=====] - 0s 6ms/step - loss: 0.2913 - accuracy: 0.9177 - val\_loss: 0.3687 - val\_accuracy: 0.8906  
Epoch 980/1000  
5/5 [=====] - 0s 6ms/step - loss: 0.2848 - accuracy: 0.9185 - val\_loss: 0.3691 - val\_accuracy: 0.8922  
Epoch 981/1000  
5/5 [=====] - 0s 6ms/step - loss: 0.2934 - accuracy: 0.9169 - val\_loss: 0.3659 - val\_accuracy: 0.8954  
Epoch 982/1000  
5/5 [=====] - 0s 6ms/step - loss: 0.2818 - accuracy: 0.9225 - val\_loss: 0.3684 - val\_accuracy: 0.8914  
Epoch 983/1000  
5/5 [=====] - 0s 6ms/step - loss: 0.2890 - accuracy: 0.9145 - val\_loss: 0.3809 - val\_accuracy: 0.8922  
Epoch 984/1000  
5/5 [=====] - 0s 6ms/step - loss: 0.3040 - accuracy: 0.9105 - val\_loss: 0.3678 - val\_accuracy: 0.8930  
Epoch 985/1000  
5/5 [=====] - 0s 6ms/step - loss: 0.2874 - accuracy: 0.9145 - val\_loss: 0.3727 - val\_accuracy: 0.8914  
Epoch 986/1000  
5/5 [=====] - 0s 6ms/step - loss: 0.3053 - accuracy: 0.9050 - val\_loss: 0.3713 - val\_accuracy: 0.8922  
Epoch 987/1000  
5/5 [=====] - 0s 6ms/step - loss: 0.2969 - accuracy: 0.9153 - val\_loss: 0.3679 - val\_accuracy: 0.8914  
Epoch 988/1000  
5/5 [=====] - 0s 6ms/step - loss: 0.2871 - accuracy: 0.9217 - val\_loss: 0.3665 - val\_accuracy: 0.8946  
Epoch 989/1000  
5/5 [=====] - 0s 6ms/step - loss: 0.2916 - accuracy: 0.9177 - val\_loss: 0.3777 - val\_accuracy: 0.8922  
Epoch 990/1000  
5/5 [=====] - 0s 6ms/step - loss: 0.3210 - accuracy: 0.9018 - val\_loss: 0.3705 - val\_accuracy: 0.8930

```
Epoch 991/1000
5/5 [=====] - 0s 6ms/step - loss: 0.2946 - accuracy: 0.9169 - val_loss: 0.3721 - val_accuracy: 0.8898
Epoch 992/1000
5/5 [=====] - 0s 6ms/step - loss: 0.2846 - accuracy: 0.9169 - val_loss: 0.3711 - val_accuracy: 0.8930
Epoch 993/1000
5/5 [=====] - 0s 6ms/step - loss: 0.3028 - accuracy: 0.9081 - val_loss: 0.3771 - val_accuracy: 0.8914
Epoch 994/1000
5/5 [=====] - 0s 7ms/step - loss: 0.2778 - accuracy: 0.9289 - val_loss: 0.3673 - val_accuracy: 0.8938
Epoch 995/1000
5/5 [=====] - 0s 6ms/step - loss: 0.2917 - accuracy: 0.9137 - val_loss: 0.3715 - val_accuracy: 0.8914
Epoch 996/1000
5/5 [=====] - 0s 6ms/step - loss: 0.3092 - accuracy: 0.9058 - val_loss: 0.3666 - val_accuracy: 0.8922
Epoch 997/1000
5/5 [=====] - 0s 6ms/step - loss: 0.2986 - accuracy: 0.9065 - val_loss: 0.3712 - val_accuracy: 0.8922
Epoch 998/1000
5/5 [=====] - 0s 6ms/step - loss: 0.2810 - accuracy: 0.9225 - val_loss: 0.3716 - val_accuracy: 0.8930
Epoch 999/1000
5/5 [=====] - 0s 6ms/step - loss: 0.2918 - accuracy: 0.9137 - val_loss: 0.3701 - val_accuracy: 0.8930
Epoch 1000/1000
5/5 [=====] - 0s 6ms/step - loss: 0.2835 - accuracy: 0.9177 - val_loss: 0.3669 - val_accuracy: 0.8938
```

In [55]: *# Final accuracy in training data*

```
_, accuracy = model.evaluate(train_X, train_Y)
print('Accuracy: %.2f' % (accuracy*100))
```

```
40/40 [=====] - 0s 530us/step - loss: 0.2328 - accuracy: 0.9409
Accuracy: 94.09
```

In [56]: *# Final accuracy in test data*

```
_, accuracy = model.evaluate(test_X, test_Y)
print('Accuracy: %.2f' % (accuracy*100))
```

```
40/40 [=====] - 0s 541us/step - loss: 0.3669 - accuracy: 0.8938
Accuracy: 89.38
```

In [57]: *# Setting the plot function for visualize training and test accuracy*

```
import matplotlib.pyplot as plt
%matplotlib inline
%config InlineBackend.figure_format = 'svg'

def plot_metric(history, metric):
    train_metrics = history.history[metric]
    val_metrics = history.history['val_'+metric]
```

```
epochs = range(1, len(train_metrics) + 1)
plt.plot(epochs, train_metrics)
plt.plot(epochs, val_metrics)
plt.title('Train and Test ' + metric)
plt.xlabel("Epochs")
plt.ylabel(metric)
plt.legend(["train_" + metric, 'val_' + metric])
plt.show()
```

In [58]: *# Plot train and test accuracy*

```
plot_metric(history, 'accuracy')
```

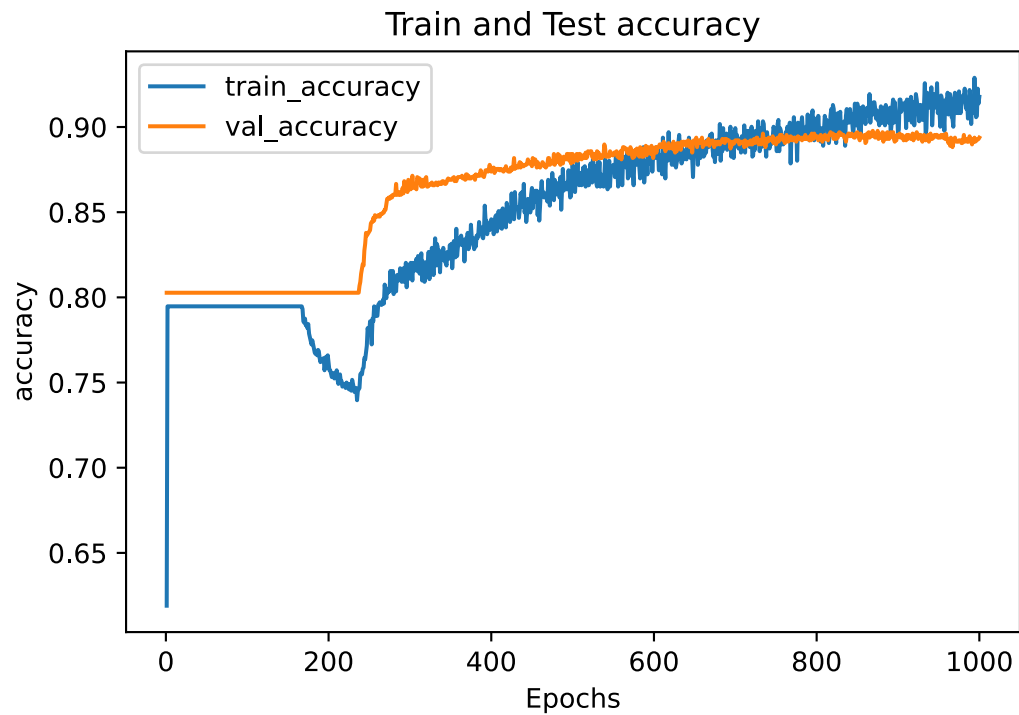

In [59]: *# Plot train and test loss*

```
plot_metric(history, 'loss')
```

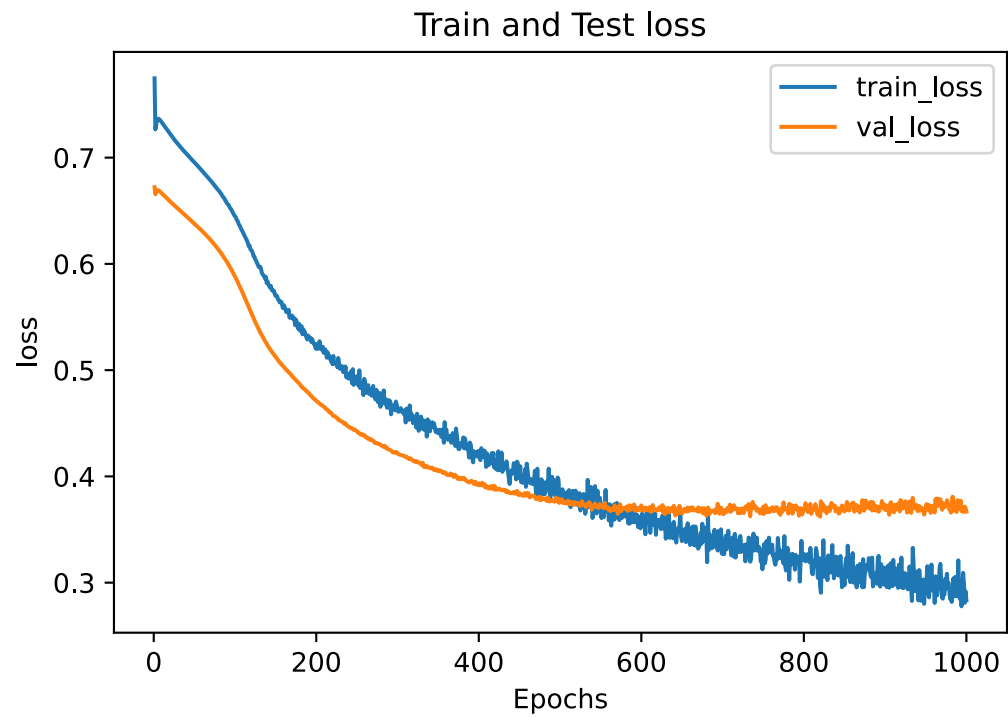

```
In [60]: # Obtain the polygenic score

from keras import backend as K

get_last_layer_output = K.function([model.layers[0].input],[model.layers[6].output])
```

```
In [61]: # Calculate AUC for training data

train_X_pred = get_last_layer_output([train_X.values])[0]

from sklearn import metrics

fpr, tpr, thresholds = metrics.roc_curve(train_Y, train_X_pred, pos_label=1)

metrics.auc(fpr, tpr)
```

```
Out[61]: 0.9742956025262499
```

```
In [62]: # Calculate AUC for test data
```

```

test_X_pred = get_last_layer_output([test_X.values])[0]

from sklearn import metrics

fpr, tpr, thresholds = metrics.roc_curve(test_Y, test_X_pred, pos_label=1)

metrics.auc(fpr, tpr)

```

Out[62]: 0.9170423187705199

```

In [63]: # Output the score to file

# Score for the training dataset

train_out=pandas.DataFrame(np.array(train_X_pred)[:,:],columns=['Score'])
train_out['FID']=train_data['FID']
train_out['Phenotype']=train_data['Phenotype']
train_out.to_csv('train_score.csv',index=False)

# Score for the test dataset

test_out=pandas.DataFrame(np.array(train_X_pred)[:,:],columns=['Score'])
test_out['FID']=train_data['FID']
test_out['Phenotype']=test_data['Phenotype']
test_out.to_csv('test_score.csv',index=False)

```

```

In [69]: # Get the second last layer output

get_2ndLast_layer_output = K.function([model.layers[0].input],[model.layers[5].output])

# Scores for the training dataset
train_2ndLast_out = pandas.DataFrame(np.array(get_2ndLast_layer_output([train_X.values]))[0,:,:],
                                     columns=['Pred_Factor1','Pred_Factor2','Pred_Factor3','Pred_Factor4','Pred_Factor5'])
train_2ndLast_out['FID']=train_data['FID']
train_2ndLast_out['Phenotype']=train_data['Phenotype']
train_2ndLast_out.to_csv('train_2ndLast_score.csv',index=False)

# Scores for the test dataset
test_2ndLast_out = pandas.DataFrame(np.array(get_2ndLast_layer_output([test_X.values]))[0,:,:],
                                    columns=['Pred_Factor1','Pred_Factor2','Pred_Factor3','Pred_Factor4','Pred_Factor5'])
test_2ndLast_out['FID']=test_data['FID']
test_2ndLast_out['Phenotype']=test_data['Phenotype']
test_2ndLast_out.to_csv('test_2ndLast_score.csv',index=False)

```
